# Supplementary material for: π-extended pyrenes: from an antiaromatic buckybowl to doubly curved nanocarbons with gulf architectures
Source: Royal Society of Chemistry journal article supplement (doi:10.1039/d4sc03460k), 2024-01-01
Supplement: d4sc03460k1.pdf [file d4sc03460k1.pdf]

*Supporting Information for:*

## **$\pi$ -Extended Pyrenes: From Antiaromatic Buckybowl to Doubly Curved Nanocarbons with Gulf Architectures**

Binbin Liu<sup>†</sup>, Zhengxiong Jin<sup>†</sup>, Xinyue Liu<sup>1</sup>, Lanfei Sun<sup>3</sup>, Cao Yang<sup>2\*</sup>, and Lei Zhang<sup>1\*</sup>

<sup>1</sup> Beijing Advanced Innovation Center for Soft Matter Science and Engineering, State Key Lab of Organic-Inorganic Composites, Beijing University of Chemical Technology, Beijing 100029, P. R. China

<sup>2</sup> School of Materials Science and Engineering, The Key Laboratory of Material Processing and Mold of Ministry of Education, Henan Key Laboratory of Advanced Nylon Materials and Application, Zhengzhou University, Zhengzhou 450001, P. R. China

<sup>3</sup> Shandong North Modern Chemistry Industry Co., Ltd., Jinan 252300, P. R. China

<sup>†</sup> B. Liu and Z. Jin contributed equally to this work.

### **Table of Contents**

|                                                                                                               |     |
|---------------------------------------------------------------------------------------------------------------|-----|
| 1. Synthesis and Characterization of Compounds.....                                                           | S2  |
| 2. UV, CV and CD Spectra of Compounds.....                                                                    | S3  |
| 3. Antiaromaticity of Compound <b>1</b> .....                                                                 | S3  |
| 4. Density Functional Theory Results.....                                                                     | S4  |
| 5. Chiral HPLC Analysis and Thermal Isomerization of <b>2<sub>meso</sub></b> and <b>2<sub>rac</sub></b> ..... | S17 |
| 6. Binding Behaviors.....                                                                                     | S19 |
| 7. X-ray Crystallographic Data for Compounds.....                                                             | S24 |
| 8. <sup>1</sup> H NMR, <sup>13</sup> C NMR, and HRMS Spectra of Compounds.....                                | S26 |
| 9. References.....                                                                                            | S30 |

## 1. Synthesis and Characterization of Compounds

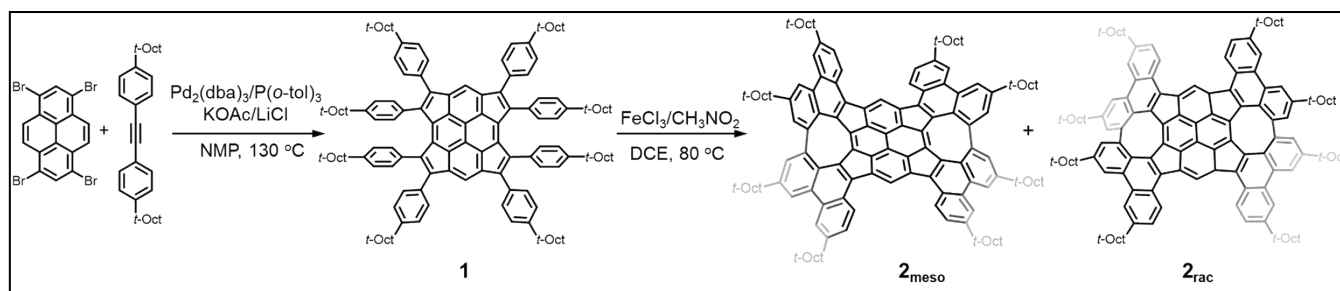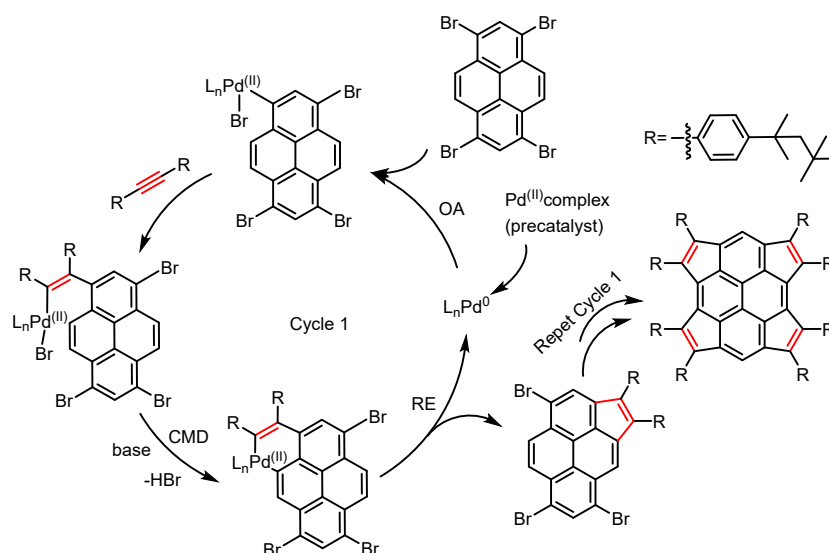

**Fig. S1** Proposed mechanism of the palladium-catalyzed cyclopentannulation<sup>1</sup>. (The MS spectrum of two intermediates is provided in Fig. S35)

Compound 1,3,6,8-tetrabromopyrene<sup>2</sup> and 1,2-bis(4-(*tert*-octyl)phenyl)ethyne<sup>3</sup> were prepared according a literature procedures.

**Synthesis of Compound 1** In a sealed tube, a solution of 1,3,6,8-tetrabromopyrene (50 mg, 0.097 mmol), 1,2-bis(4-(*tert*-octyl)phenyl)ethyne (156 mg, 0.386 mmol), Pd<sub>2</sub>(dba)<sub>3</sub> (35.5 mg, 0.0386 mmol), P(*o*-Tol)<sub>3</sub> (17.7 mg, 0.0582 mmol), KOAc (93mg, 0.97 mmol), LiCl (16.45 mg, 0.388 mmol) and NMP (5 ml) was degassed with nitrogen for 3 times and then stirred at 130 °C for 36 h. After cooling the mixture was to room temperature, the mixture was diluted with dichloromethane and washed with water, and dried over anhydrous sodium sulfate. The organic layer was evaporated and the solid was washed with acetone. The crude product was further purified by short column chromatography on silica gel eluted with dichloromethane and washed with acetone. The product **1** was obtained as yellow solid (35 mg, 20%).

<sup>1</sup>H NMR (400 MHz, Chloroform-*d*, 298 K) δ 7.08 (d, *J* = 8.3 Hz, 8H), 6.78 (d, *J* = 8.2 Hz, 8H), 6.69 (d, *J* = 8.2 Hz, 8H), 6.61 (d, *J* = 8.4 Hz, 8H), 6.46 (s, 2H), 1.64 (s, 8H), 1.45 (s, 8H), 1.28 (s, 24H), 1.15(s, 24H), 0.69 (s, 36H), 0.63 (s, 36H). <sup>13</sup>C NMR (101 MHz, Chloroform-*d*, 298K) δ 148.51, 147.34, 146.80, 144.26, 143.27, 141.78, 138.65, 138.49, 132.22, 132.04, 129.26, 128.30, 125.75, 124.61, 122.16, 117.72, 57.95, 57.28, 38.36, 38.10, 32.39, 32.30, 31.76, 31.74, 31.31, 30.82. HR-MALDI-TOF (*m/z*): Calcd (%) for C<sub>136</sub>H<sub>170</sub>: 1803.32033, found: 1803.32988.

**Synthesis of Compound 2<sub>meso</sub> and 2<sub>rac</sub>**. In a 100mL two-necked round-bottom flask, **1** (100 mg, 0.055 mmol) was dissolved in dry 1,2-dichloroethane (60 ml) and degassed with nitrogen for 10 min. The mixture was heated to 80 °C

and FeCl<sub>3</sub> (162 mg, 0.997mmol) in CH<sub>3</sub>NO<sub>2</sub> (2 ml) was added dropwise. After 1.5 h, the mixture was quenched with MeOH (15 mL) and was extracted with DCM (30 mL). The organic layer was dried over anhydrous sodium sulfate and the organic layer was evaporated. The crude product was purified by column chromatography on silica gel eluted with dichloromethane: petroleum ether (1 : 20) and further by HPLC (dichloromethane/petroleum ether 9 : 1) to afford compounds **2**<sub>meso</sub> (2 mg, 2%) and **2**<sub>rac</sub> (1.5 mg, 1.5%) as red solid.

**2**<sub>meso</sub>: <sup>1</sup>H NMR (400 MHz, Chloroform-*d*, 298 K) δ 8.59 (s, 4H), 8.47 (d, *J* = 8.8 Hz, 8H), 8.22 (s, 2H), 7.91 – 7.82 (m, 4H), 6.99 (d, *J* = 1.8 Hz, 4H), 2.07 (d, *J* = 14.9 Hz, 4H), 1.96 (d, *J* = 14.7 Hz, 4H), 1.87 (d, *J* = 14.6 Hz, 4H), 1.75 (d, *J* = 14.6 Hz, 4H), 1.63 (d, *J* = 13.8 Hz, 24H), 1.44 (d, *J* = 7.4 Hz, 24H), 0.86 (s, 36H), 0.81 (s, 36H). <sup>13</sup>C NMR (101 MHz, Chloroform-*d*, 298K) δ 149.21, 146.36, 141.48, 141.07, 139.56, 138.97, 136.46, 135.02, 134.44, 132.09, 130.33, 128.62, 127.38, 126.41, 124.37, 121.05, 120.64, 120.30, 119.85, 56.77, 56.64, 39.35, 38.75, 32.59, 32.53, 32.35, 32.08, 32.04, 31.03, 30.23, 29.71. HR-MALDI-TOF (*m/z*): Calcd (%) for C<sub>136</sub>H<sub>158</sub>: 1791.23636, found: 1791.23541.

**2**<sub>rac</sub>: <sup>1</sup>H NMR (400 MHz, Chloroform-*d*, 298 K) δ 8.62 (s, 4H), 8.50 (d, *J* = 9.0 Hz, 8H), 8.31 (s, 2H), 7.93 – 7.86 (m, 4H), 6.98 (d, *J* = 1.7 Hz, 4H), 2.07 (d, *J* = 14.7 Hz, 4H), 1.99 (d, *J* = 14.7 Hz, 4H), 1.87 (d, *J* = 14.6 Hz, 4H), 1.75 (d, *J* = 14.6 Hz, 4H), 1.64 (d, *J* = 7.3 Hz, 24H), 1.45 (d, *J* = 10.5 Hz, 24H), 0.88 (s, 36H), 0.80 (s, 36H). <sup>13</sup>C NMR (100 MHz, Chloroform-*d*, 298K) δ 149.16, 146.30, 141.71, 141.11, 139.65, 139.26, 136.63, 135.04, 134.37, 132.09, 130.37, 128.63, 127.50, 126.47, 124.36, 121.02, 120.29, 119.60, 56.81, 56.64, 39.35, 38.74, 32.60, 32.52, 32.21, 32.08, 32.03, 31.20, 30.23, 29.71. HR-MALDI-TOF (*m/z*): Calcd (%) for C<sub>136</sub>H<sub>158</sub>: 1791.23636, found: 1791.23597.

## 2. UV, CV and CD Spectra of Compounds

UV-vis absorption spectra were measured with Shimadzu (UV- 3600i Plus) in CHCl<sub>3</sub> at room temperature; Circular dichroism (CD) measurements were carried out on a J-815-150S Spectrometer in CHCl<sub>3</sub> at room temperature. Cyclic voltammetry (CV) was recorded on a CHI620E electrochemical workstation using glassy carbon discs as the working electrode, Pt wire as the counter electrode, Ag/Ag<sup>+</sup> electrode as the reference electrode, and ferrocene/ferrocenium as an internal potential marker. The experiments were performed in nitrogen-purged DCM with tetrabutylammonium hexafluorophosphate (TBAPF<sub>6</sub>, 0.1 M) as the supporting electrolyte with a scan of 100 mV/s.

## 3. Antiaromaticity of Compound **1**

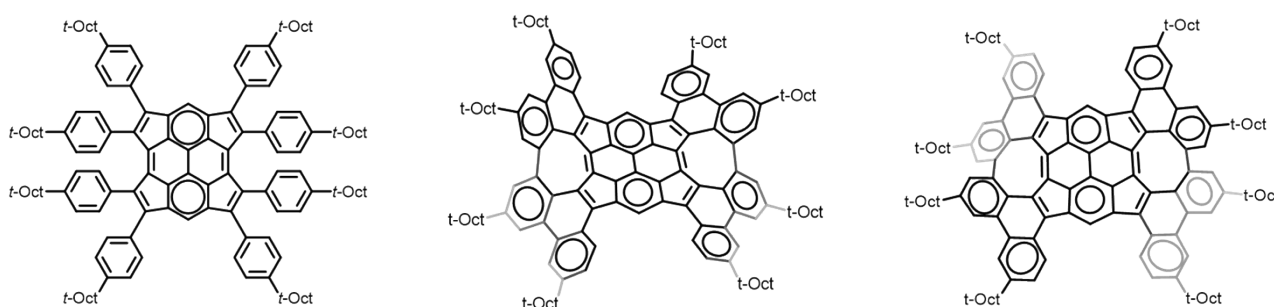

Fig. S2 The most representative Clar structures of **1**, **2**<sub>rac</sub>, and **2**<sub>meso</sub>.

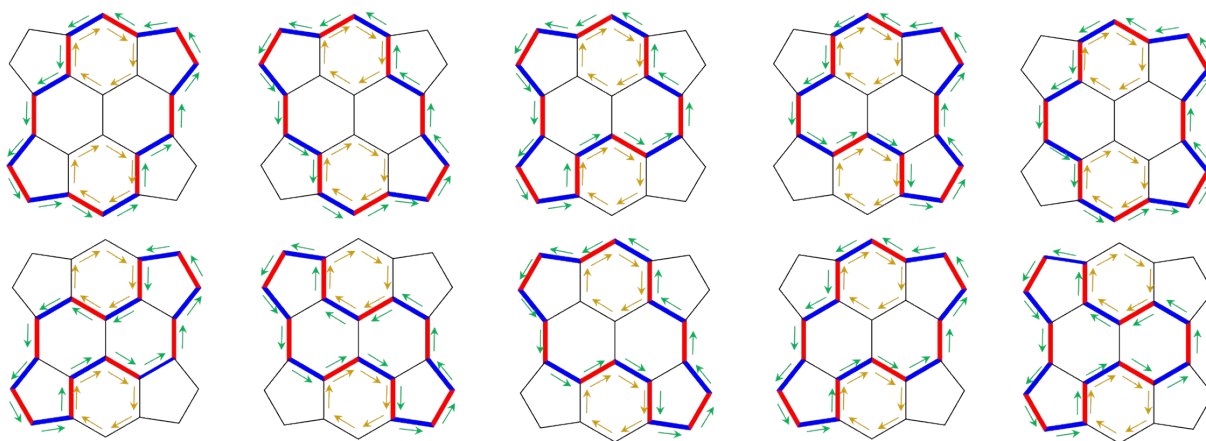

**Fig. S3** The possible resonance structures for TPP with two Clar's sextets and total  $4n$   $16$   $\pi$ -electrons. The conjugated pathways (in bold) with an alternation of the C-C single (red) and double (blue) bonds. Green arrow: paratropic current; yellow arrow: diatropic current.

#### 4. Density Functional Theory Results

All density functional theory (DFT) calculations were performed using Gaussian 09, Revision D.01 program.<sup>4</sup> All optimized structures were conducted at the B<sub>3</sub>LYP level with the 6-31G(d,p) basis set at gas phase, the same level of frequency analysis confirmed that all optimized structures were energy minima structures on the potential energy surface. Time-dependent density functional theory (TD-DFT) and were calculated at the B<sub>3</sub>LYP/6-31G(d,p) level in CHCl<sub>3</sub> with the IEFPCM solvent model and at least the 100 excited states were considered. For better comparison with experimental data, Lorentz broadening with a half width at half height of 0.3 eV was applied to obtain the line spectra. CD spectra and Major orbital transition contributions in excited states were generated using Multiwfn 3.8 software.<sup>5</sup> Independent gradient model based on Hirshfeld partition (IGMH) method<sup>6</sup> was performed in Multiwfn and the visual isosurface images were obtained by VMD.<sup>7</sup> NICS values were calculated at the B<sub>3</sub>LYP/6-31G(d,p) using the standard GIAO procedure;<sup>8</sup> ACID plot was calculated by using the method developed by Herges based on the optimized ground-state geometries.<sup>9</sup> The optimization and frequency calculations of the transition states (TS) were conducted at the B<sub>3</sub>LYP/6-31G(d,p) level at gas phase and only one imaginary frequency exists. The connection between the transition states and the ground state was confirmed by IRC calculation.

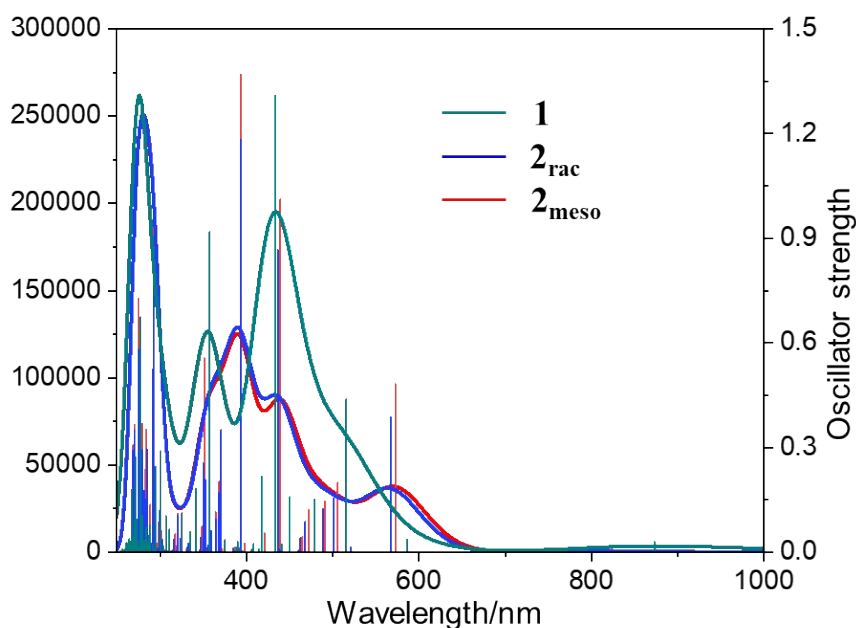

**Fig. S4** Calculated UV-vis spectra of **1**, **2<sub>meso</sub>** and **2<sub>rac</sub>** at the B<sub>3</sub>LYP/6-31G(d,p) level in CHCl<sub>3</sub> solution.

**Table S1.** TD-DFT singlet excitation energies  $E$ , excitation wavelengths  $\lambda$ , oscillator strengths  $f$ , and orbital contributions of **1** at the B<sub>3</sub>LYP/6-311G(d,p) level in CHCl<sub>3</sub> solution.

| Excited state   | Energy (eV) | Wavelength (nm) | $f$     | Contributions                                                  |
|-----------------|-------------|-----------------|---------|----------------------------------------------------------------|
| S <sub>1</sub>  | 1.2925      | 959.26          | 0.00010 | HOMO→LUMO: 99.3%                                               |
| S <sub>5</sub>  | 2.4044      | 515.66          | 0.36470 | HOMO-4→LUMO: 85.7%<br>HOMO→LUMO+1: 12.1%                       |
| S <sub>8</sub>  | 2.5894      | 478.81          | 0.12480 | HOMO-6→LUMO: 87.3%                                             |
| S <sub>10</sub> | 2.7525      | 450.44          | 0.13160 | HOMO-1→LUMO+1: 89.1%<br>HOMO-6→LUMO: 5.8%                      |
| S <sub>13</sub> | 2.8617      | 433.25          | 1.08960 | HOMO→LUMO+1: 76.3%<br>HOMO-4→LUMO: 9.3%<br>HOMO-11→LUMO: 9.2%  |
| S <sub>15</sub> | 2.9688      | 417.62          | 0.18110 | HOMO-11→LUMO: 82.6%<br>HOMO-12→LUMO: 7.7%<br>HOMO→LUMO+1: 6.7% |

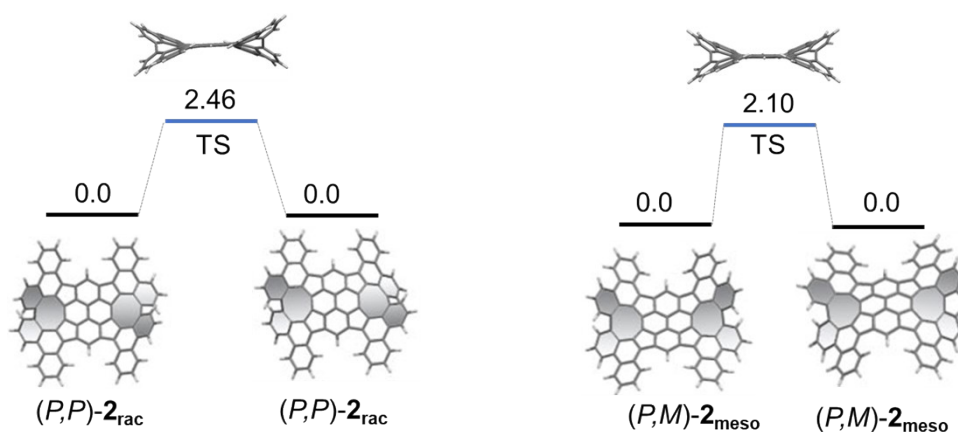

**Fig. S5** Calculated diagram for the bowl inversion process of (P,P)-2<sub>rac</sub> (left) and (P,M)-2<sub>meso</sub> (right)

**Table S2.** Cartesian coordinates of optimized structures ((P,P)-2<sub>rac</sub>) calculated by B<sub>3</sub>LYP/6-311G(d,p) level of theory.

| (P,P)-2 <sub>rac</sub> |             |            |             |   |             |             |             |
|------------------------|-------------|------------|-------------|---|-------------|-------------|-------------|
| C                      | -1.04876000 | 1.48223900 | -0.70981200 | H | -3.99287500 | 7.91125500  | 1.86786300  |
| C                      | 0.07092900  | 0.69242400 | -0.85297900 | H | -7.35696000 | 2.16095200  | 3.16919500  |
| C                      | 1.32923600  | 1.21673300 | -0.67571800 | H | -8.42940700 | -0.74391500 | -2.26293200 |
| C                      | 1.52121500  | 2.58171500 | -0.43370900 | H | -6.08296900 | -7.00302100 | -0.90775400 |
| C                      | 0.37622800  | 3.40469300 | -0.29137300 | C | 1.04876700  | -1.48230300 | -0.70964000 |
| H                      | 0.48378500  | 4.43882100 | -0.00199600 | C | -0.07091900 | -0.69250200 | -0.85290500 |
| C                      | -0.92338200 | 2.84225700 | -0.41150700 | C | -1.32922900 | -1.21679300 | -0.67561900 |
| C                      | -2.30047300 | 3.25711900 | -0.04100000 | C | -1.52121300 | -2.58175400 | -0.43348900 |
| C                      | -2.73900300 | 4.52496200 | 0.44021700  | C | -0.37623000 | -3.40471800 | -0.29105200 |
| C                      | -2.00226300 | 5.71322900 | 0.23509400  | H | -0.48379400 | -4.43882000 | -0.00158500 |
| H                      | -1.10637400 | 5.67857300 | -0.36893300 | C | 0.92338400  | -2.84229400 | -0.41121200 |
| C                      | -2.43972500 | 6.91547500 | 0.74484000  | C | 2.30047100  | -3.25712300 | -0.04065200 |
| H                      | -1.87299100 | 7.82167000 | 0.56650100  | C | 2.73899900  | -4.52492600 | 0.44067300  |
| C                      | -3.63662600 | 6.96562600 | 1.47652800  | C | 2.00226800  | -5.71321300 | 0.23563600  |
| C                      | -4.37906400 | 5.81955900 | 1.67530800  | H | 1.10638600  | -5.67861200 | -0.36840400 |

|   |             |             |             |   |            |             |             |
|---|-------------|-------------|-------------|---|------------|-------------|-------------|
| H | -5.32016100 | 5.89778100  | 2.20198900  | C | 2.43973000 | -6.91541700 | 0.74548300  |
| C | -3.96047600 | 4.57186400  | 1.16632600  | H | 1.87300200 | -7.82162900 | 0.56721000  |
| C | -4.74811600 | 3.35912800  | 1.33858400  | C | 3.63662400 | -6.96550400 | 1.47718700  |
| C | -5.80042900 | 3.32527900  | 2.27202700  | C | 4.37905400 | -5.81941800 | 1.67588400  |
| H | -5.97777800 | 4.17897900  | 2.91077100  | H | 5.32014700 | -5.89759200 | 2.20257900  |
| C | -6.57820000 | 2.20101800  | 2.41716400  | C | 3.96046400 | -4.57176500 | 1.16680000  |
| C | -6.39771400 | 1.12946900  | 1.53950000  | C | 4.74809600 | -3.35901300 | 1.33897200  |
| H | -7.08308600 | 0.29231100  | 1.57929300  | C | 5.80039600 | -3.32508700 | 2.27242700  |
| C | -5.39134000 | 1.11141000  | 0.57618800  | H | 5.97773700 | -4.17873600 | 2.91124100  |
| C | -5.64354100 | 0.02282100  | -0.44472300 | C | 6.57816400 | -2.20081300 | 2.41748400  |
| C | -6.85714200 | 0.17146200  | -1.10553500 | C | 6.39768800 | -1.12933600 | 1.53972900  |
| H | -7.34838900 | 1.13627500  | -1.07160600 | H | 7.08306000 | -0.29217500 | 1.57946100  |
| C | -7.49614300 | -0.90361100 | -1.73639400 | C | 5.39132700 | -1.11135600 | 0.57640200  |
| C | -6.97743400 | -2.17165600 | -1.60571600 | C | 5.64354700 | -0.02285500 | -0.44459800 |
| H | -7.51699400 | -3.01139600 | -2.02127800 | C | 6.85716400 | -0.17155200 | -1.10536900 |
| C | -5.73039300 | -2.37733000 | -0.98239100 | H | 7.34841200 | -1.13636100 | -1.07134300 |
| C | -5.17987300 | -3.71375900 | -0.80418000 | C | 7.49617800 | 0.90346700  | -1.73630800 |
| C | -5.96728600 | -4.87109500 | -0.97650900 | C | 6.97746200 | 2.17152200  | -1.60575400 |
| H | -7.01318600 | -4.77397400 | -1.23397900 | H | 7.51703000 | 3.01122700  | -2.02137800 |
| C | -5.44737400 | -6.13436300 | -0.78245500 | C | 5.73040800 | 2.37724800  | -0.98247600 |
| C | -4.10468700 | -6.29518900 | -0.40683600 | C | 5.17988200 | 3.71369200  | -0.80439500 |
| H | -3.70033800 | -7.28750400 | -0.24569500 | C | 5.96729900 | 4.87101300  | -0.97680100 |
| C | -3.30656300 | -5.18653200 | -0.23290500 | H | 7.01320700 | 4.77387000  | -1.23423400 |
| H | -2.27913300 | -5.31203300 | 0.07561400  | C | 5.44738200 | 6.13429700  | -0.78286800 |
| C | -3.81565200 | -3.88234700 | -0.42200000 | C | 4.10468600 | 6.29515500  | -0.40729700 |
| C | -3.00397900 | -2.71230000 | -0.32113000 | H | 3.70033300 | 7.28748400  | -0.24624900 |
| C | -3.58532900 | -1.43461300 | -0.32790000 | C | 3.30655700 | 5.18651300  | -0.23329300 |
| C | -2.52978700 | -0.42059100 | -0.50009100 | H | 2.27911900 | 5.31204000  | 0.07519200  |
| C | -2.38826000 | 0.96001800  | -0.49445400 | C | 3.81565100 | 3.88231200  | -0.42226500 |
| C | -3.16017200 | 2.14420700  | -0.06540500 | C | 3.00397600 | 2.71227300  | -0.32131800 |
| C | -4.44840200 | 2.18613900  | 0.56665900  | C | 3.58532800 | 1.43458600  | -0.32795600 |
| C | -4.98643200 | -1.24209500 | -0.53598900 | C | 2.52979100 | 0.42054600  | -0.50008500 |
| H | 6.08298100  | 7.00294500  | -0.90822400 | C | 2.38826400 | -0.96006200 | -0.49430900 |
| H | 8.42945400  | 0.74372500  | -2.26281100 | C | 3.16016800 | -2.14421100 | -0.06513800 |
| H | 7.35691300  | -2.16068500 | 3.16952100  | C | 4.44838900 | -2.18608700 | 0.56694800  |
| H | 3.99287500  | -7.91110000 | 1.86859900  | C | 4.98643700 | 1.24205100  | -0.53599200 |

TS

|   |             |             |             |   |             |             |             |
|---|-------------|-------------|-------------|---|-------------|-------------|-------------|
| C | 2.48567800  | 0.69526900  | 0.00391100  | C | -3.36930000 | 6.69197500  | 0.55198100  |
| C | 2.48554000  | -0.69579500 | -0.00495600 | C | -2.72927800 | 5.51938300  | 0.21828400  |
| C | 1.19478000  | -1.35441800 | -0.02607400 | C | -5.58832700 | 0.56518600  | 0.50697600  |
| C | -0.00007100 | -0.69109200 | -0.00089800 | C | -6.71063700 | 0.51750800  | 1.32811500  |
| C | 0.00007100  | 0.69109200  | -0.00090100 | C | -7.13999900 | 1.62000000  | 2.07499400  |
| C | 1.19505300  | 1.35416400  | 0.02459700  | C | -6.50071100 | 2.82852500  | 1.92494400  |
| C | -1.19478000 | 1.35441800  | -0.02608000 | C | -5.33581300 | 2.93324200  | 1.14071000  |
| C | -1.23785500 | 2.74856800  | 0.00390700  | H | 5.17589900  | -7.56780000 | 1.34860400  |
| C | 0.00036600  | 3.45735400  | -0.00042800 | H | 8.00589600  | -1.53163000 | 2.72007300  |
| C | 1.23844200  | 2.74831400  | -0.00492700 | H | 8.00751300  | 1.53018000  | -2.71833000 |
| C | -1.19505400 | -1.35416400 | 0.02460100  | H | 5.17794600  | 7.56680800  | -1.34808300 |

|   |             |             |             |   |             |             |             |
|---|-------------|-------------|-------------|---|-------------|-------------|-------------|
| C | -2.48567800 | -0.69526900 | 0.00391200  | H | -5.17589900 | 7.56780500  | 1.34857400  |
| C | -2.48554000 | 0.69579500  | -0.00496100 | H | -8.00589800 | 1.53164000  | 2.72006000  |
| C | 1.23785500  | -2.74856800 | 0.00391800  | C | -2.70167700 | -3.03120400 | -0.12955300 |
| C | -0.00036600 | -3.45735400 | -0.00041500 | C | -3.42569800 | -1.82180600 | -0.11807600 |
| C | -1.23844200 | -2.74831400 | -0.00491800 | C | -4.79308400 | -1.75348300 | -0.53573700 |
| C | 3.42569800  | 1.82180600  | -0.11807900 | C | -3.35406800 | -4.26613800 | -0.41459000 |
| C | 2.70167700  | 3.03120400  | -0.12956100 | C | -2.73055800 | -5.51884500 | -0.21860600 |
| C | -2.70098200 | 3.03175100  | 0.12902400  | C | -3.37092200 | -6.69132000 | -0.55205500 |
| C | -3.42527500 | 1.82251200  | 0.11761700  | C | -4.66403800 | -6.64652700 | -1.09659700 |
| C | 3.42527500  | -1.82251100 | 0.11762700  | C | -5.29476400 | -5.43487000 | -1.29215300 |
| C | 2.70098200  | -3.03175000 | 0.12903800  | C | -4.66963700 | -4.21456700 | -0.96019600 |
| C | 3.35406900  | 4.26613700  | -0.41460300 | C | -5.33690400 | -2.93222000 | -1.14024000 |
| C | 4.79308400  | 1.75348100  | -0.53573900 | C | -6.50216000 | -2.82731400 | -1.92391900 |
| C | -3.35299300 | 4.26680000  | 0.41441000  | C | -7.14130500 | -1.61867900 | -2.07369500 |
| C | -4.79249300 | 1.75443100  | 0.53589000  | C | -6.71138700 | -0.51623600 | -1.32705900 |
| C | 3.35299300  | -4.26679900 | 0.41442900  | C | -5.58868100 | -0.56408900 | -0.50647700 |
| C | 4.79249200  | -1.75442900 | 0.53590000  | H | -5.17794500 | -7.56681300 | -1.34806000 |
| C | 5.33690500  | 2.93221600  | -1.14024600 | H | -8.00751000 | -1.53019000 | -2.71833100 |
| C | 6.50216100  | 2.82730700  | -1.92392400 | H | 0.00046200  | 4.53696000  | -0.00020000 |
| C | 7.14130700  | 1.61867200  | -2.07369400 | H | -0.00046200 | -4.53696000 | -0.00018300 |
| C | 6.71138900  | 0.51623100  | -1.32705500 | H | 6.87774800  | 3.69493000  | -2.44818200 |
| C | 5.58868100  | 0.56408700  | -0.50647400 | H | 7.29694600  | -0.39461100 | -1.34361000 |
| C | 5.58832700  | -0.56518400 | 0.50698300  | H | 7.29633600  | 0.39324300  | 1.34494800  |
| C | 6.71063600  | -0.51750300 | 1.32812300  | H | 6.87586900  | -3.69619400 | 2.44943700  |
| C | 7.13999700  | -1.61999300 | 2.07500600  | H | 6.30391000  | -5.43416900 | 1.67721200  |
| C | 6.50070900  | -2.82851800 | 1.92495900  | H | 2.88334900  | -7.64549600 | 0.38232500  |
| C | 5.33581300  | -2.93323700 | 1.14072500  | H | 1.74879400  | -5.55238100 | -0.23511100 |
| C | 4.66838200  | -4.21546800 | 0.96047300  | H | 1.74993700  | 5.55203600  | 0.23447800  |
| C | 5.29316200  | -5.43588100 | 1.29267500  | H | 2.88510700  | 7.64493200  | -0.38251700 |
| C | 4.66225500  | -6.64741800 | 1.09695300  | H | 6.30563500  | 5.43296800  | -1.67638100 |
| C | 3.36929900  | -6.69197300 | 0.55200800  | H | -6.30391100 | 5.43417500  | 1.67718800  |
| C | 2.72927800  | -5.51938200 | 0.21830700  | H | -2.88334900 | 7.64549700  | 0.38229500  |
| C | 2.73055900  | 5.51884400  | -0.21862300 | H | -1.74879400 | 5.55238000  | -0.23513400 |
| C | 3.37092200  | 6.69131800  | -0.55207600 | H | -7.29633700 | -0.39323800 | 1.34494300  |
| C | 4.66403800  | 6.64652300  | -1.09661700 | H | -6.87587000 | 3.69620200  | 2.44941800  |
| C | 5.29476500  | 5.43486500  | -1.29216800 | H | -1.74993700 | -5.55203500 | 0.23449600  |
| C | 4.66963700  | 4.21456400  | -0.96020700 | H | -2.88510700 | -7.64493400 | -0.38249200 |
| C | -4.66838300 | 4.21547200  | 0.96045400  | H | -6.30563400 | -5.43297400 | -1.67636700 |
| C | -5.29316200 | 5.43588600  | 1.29265200  | H | -6.87774600 | -3.69493900 | -2.44817500 |
| C | -4.66225500 | 6.64742200  | 1.09692600  | H | -7.29694500 | 0.39460700  | -1.34361800 |

**Table S3.** Cartesian coordinates of optimized structures ( $(P,M)$ - $2_{\text{meso}}$ ) calculated by B3LYP/6-311G(d,p) level of theory.

| $(P,M)$ - $2_{\text{meso}}$ |             |            |             |   |             |             |             |
|-----------------------------|-------------|------------|-------------|---|-------------|-------------|-------------|
| C                           | -1.20282800 | 1.25958400 | -0.93256100 | H | -8.25536800 | -1.98397400 | -2.02798800 |

|   |             |             |             |   |             |             |             |
|---|-------------|-------------|-------------|---|-------------|-------------|-------------|
| C | 0.00001300  | 0.58548000  | -0.94137800 | H | -5.27532300 | -7.62370100 | 0.39590600  |
| C | 1.20282500  | 1.25962800  | -0.93256900 | H | 4.83839700  | 7.69450500  | 0.49645000  |
| C | 1.23037600  | 2.65764000  | -0.89291500 | C | 1.18990100  | -1.37922000 | -0.29828300 |
| C | -0.00004300 | 3.36438700  | -0.86453200 | C | 0.00004100  | -0.75589700 | -0.57316100 |
| H | -0.00006800 | 4.43114400  | -0.69641600 | C | -1.18979500 | -1.37926200 | -0.29827700 |
| C | -1.23044400 | 2.65758900  | -0.89293600 | C | -1.23106200 | -2.70700400 | 0.13804300  |
| C | -2.64636500 | 2.98266200  | -0.57962000 | C | 0.00009800  | -3.39033200 | 0.33529400  |
| C | -3.22144500 | 4.26135900  | -0.32465600 | H | 0.00010100  | -4.42174000 | 0.65327200  |
| C | -2.61072800 | 5.46599000  | -0.74017800 | C | 1.23122200  | -2.70697200 | 0.13802600  |
| H | -1.70731000 | 5.41957200  | -1.33208100 | C | 2.69558300  | -2.98170400 | 0.25367300  |
| C | -3.17718800 | 6.68619500  | -0.44596600 | C | 3.37489800  | -4.23315900 | 0.35081000  |
| H | -2.70565000 | 7.60164400  | -0.78320300 | C | 2.73579700  | -5.41806800 | 0.77855800  |
| C | -4.38118100 | 6.73752400  | 0.27387700  | H | 1.71444400  | -5.36772000 | 1.12734800  |
| C | -5.00142400 | 5.57254600  | 0.67688600  | C | 3.40362800  | -6.62235100 | 0.79324700  |
| H | -5.95073100 | 5.64305100  | 1.18968900  | H | 2.90154200  | -7.51935300 | 1.13591100  |
| C | -4.44878500 | 4.30580300  | 0.39247200  | C | 4.74208900  | -6.68061200 | 0.37488900  |
| C | -5.10577100 | 3.06620000  | 0.78429700  | C | 5.38954800  | -5.53608900 | -0.04357400 |
| C | -6.16217000 | 3.08691300  | 1.71376800  | H | 6.43145800  | -5.60290900 | -0.32578000 |
| H | -6.44080400 | 4.01718900  | 2.18826700  | C | 4.73817500  | -4.28543000 | -0.06727100 |
| C | -6.81600200 | 1.92934000  | 2.06390300  | C | 5.42584500  | -3.06825000 | -0.47620100 |
| C | -6.50768000 | 0.74224500  | 1.39507700  | C | 6.67254100  | -3.11001200 | -1.13164000 |
| H | -7.09956400 | -0.14328200 | 1.58940600  | H | 7.10882200  | -4.06229200 | -1.39975100 |
| C | -5.49121000 | 0.65994900  | 0.44618800  | C | 7.32215000  | -1.94741100 | -1.47915700 |
| C | -5.60900600 | -0.61541200 | -0.36159200 | C | 6.81650700  | -0.71623000 | -1.04222300 |
| C | -6.81648600 | -0.71655000 | -1.04209500 | H | 7.40820700  | 0.18058300  | -1.18001000 |
| H | -7.40825300 | 0.18022500  | -1.17984900 | C | 5.60907800  | -0.61518700 | -0.36160800 |
| C | -7.32209700 | -1.94777200 | -1.47895400 | C | 5.49123100  | 0.66016500  | 0.44621200  |
| C | -6.67240200 | -3.11032800 | -1.13144500 | C | 6.50756400  | 0.74243500  | 1.39525200  |
| H | -7.10864100 | -4.06264700 | -1.39949100 | H | 7.09943800  | -0.14308300 | 1.58963200  |
| C | -5.42568600 | -3.06847100 | -0.47605700 | C | 6.81576200  | 1.92950900  | 2.06417800  |
| C | -4.73795700 | -4.28560300 | -0.06707600 | C | 6.16194000  | 3.08707800  | 1.71401400  |
| C | -5.38930400 | -5.53626800 | -0.04326300 | H | 6.44046800  | 4.01733200  | 2.18861600  |
| H | -6.43122300 | -5.60312500 | -0.32542300 | C | 5.10563200  | 3.06637300  | 0.78443600  |
| C | -4.74180000 | -6.68074700 | 0.37525800  | C | 4.44858100  | 4.30596500  | 0.39266500  |
| C | -3.40332600 | -6.62242400 | 0.79355800  | C | 5.00112700  | 5.57272700  | 0.67716300  |
| H | -2.90120500 | -7.51938800 | 1.13627100  | H | 5.95042400  | 5.64326800  | 1.18997400  |
| C | -2.73520000 | -5.41812400 | 0.77875800  | C | 4.38079700  | 6.73768700  | 0.27422900  |
| H | -1.71415500 | -5.36772800 | 1.12750400  | C | 3.17679700  | 6.68631500  | -0.44560000 |
| C | -3.37466600 | -4.23326700 | 0.35095100  | H | 2.70517800  | 7.60175100  | -0.78275800 |
| C | -2.69540100 | -2.98179000 | 0.25372800  | C | 2.61042300  | 5.46608700  | -0.73988600 |
| C | -3.41417400 | -1.79553700 | 0.02720500  | H | 1.70698100  | 5.41964600  | -1.33175300 |
| C | -2.47338600 | -0.71253800 | -0.30550800 | C | 3.22124900  | 4.26147800  | -0.32447300 |
| C | -2.47815100 | 0.64701500  | -0.58770400 | C | 2.64626300  | 2.98275900  | -0.57951800 |
| C | -3.37943400 | 1.79833500  | -0.38931800 | C | 3.37940000  | 1.79846600  | -0.38928300 |



|   |             |             |             |   |            |             |             |
|---|-------------|-------------|-------------|---|------------|-------------|-------------|
| C | -4.67164000 | 1.81280800  | 0.23570300  | C | 2.47817000 | 0.64711200  | -0.58770200 |
| C | -4.82070600 | -1.79863400 | -0.22536900 | C | 2.47345600 | -0.71244700 | -0.30550300 |
| H | -4.83885300 | 7.69432000  | 0.49604100  | C | 3.41429900 | -1.79541000 | 0.02716600  |
| H | 5.27563400  | -7.62355500 | 0.39544500  | C | 4.82082500 | -1.79844700 | -0.22543100 |
| H | 8.25538700  | -1.98355100 | -2.02825300 | C | 4.67160500 | 1.81299100  | 0.23574100  |
| H | -7.59748900 | 1.94169100  | 2.81408900  | H | 7.59713800 | 1.94184500  | 2.81448000  |

TS

|   |              |             |             |   |             |             |             |
|---|--------------|-------------|-------------|---|-------------|-------------|-------------|
| C | -1.19539500  | 1.31291300  | -0.33771200 | H | -7.98348900 | -1.97462300 | -2.43187300 |
| C | 0.00000000   | 0.66242500  | -0.19987300 | H | -5.14210000 | -7.68847500 | -0.06139800 |
| C | 1.19539500   | 1.31291300  | -0.33771200 | H | 5.14191600  | 7.68850300  | 0.06176000  |
| C | 1.23771100   | 2.69460900  | -0.53213600 | C | 1.19538900  | -1.31296200 | 0.33720400  |
| C | 0.00000000   | 3.39904000  | -0.61178400 | C | 0.00000000  | -0.66249600 | 0.19924700  |
| H | 0.00000000   | 4.47702100  | -0.67816600 | C | -1.19539000 | -1.31296200 | 0.33720400  |
| C | -1.23771100  | 2.69461000  | -0.53213600 | C | -1.23771200 | -2.69463100 | 0.53182100  |
| C | -2.69735900  | 3.00108800  | -0.42463800 | C | 0.00000000  | -3.39905400 | 0.61155500  |
| C | -3.34256200  | 4.26901200  | -0.33760700 | H | 0.00000000  | -4.47702300 | 0.67813100  |
| C | -2.71918000  | 5.46813100  | -0.74994200 | C | 1.23771100  | -2.69463100 | 0.53182100  |
| H | -1.74579300  | 5.41884300  | -1.21734300 | C | 2.69737900  | -3.00108900 | 0.42449500  |
| C | -3.35066100  | 6.68325800  | -0.60604000 | C | 3.34262700  | -4.26900100 | 0.33761100  |
| H | -2.86506000  | 7.59287700  | -0.93908100 | C | 2.71923400  | -5.46811300 | 0.74995000  |
| C | -4.63490100  | 6.73639000  | -0.04163700 | H | 1.74579600  | -5.41882400 | 1.21724700  |
| C | -5.266634100 | 5.57741400  | 0.36143600  | C | 3.35075800  | -6.68323400 | 0.60617800  |
| H | -6.27098300  | 5.64531800  | 0.75583200  | H | 2.86514400  | -7.59284600 | 0.93921900  |
| C | -4.65029900  | 4.31540800  | 0.22768800  | C | 4.63505400  | -6.73636700 | 0.04190400  |
| C | -5.31906800  | 3.08385200  | 0.62625200  | C | 5.26650600  | -5.57739800 | -0.36117300 |
| C | -6.47896000  | 3.11494900  | 1.42426300  | H | 6.27118700  | -5.64530000 | -0.75547000 |
| H | -6.84992300  | 4.05909400  | 1.79797600  | C | 4.65042200  | -4.31539900 | -0.22755500 |
| C | -7.12025900  | 1.95045400  | 1.77763100  | C | 5.31920500  | -3.08385200 | -0.62612100 |
| C | -6.69712800  | 0.73639200  | 1.22544700  | C | 6.47918200  | -3.11495600 | -1.42401000 |
| H | -7.28379000  | -0.15726300 | 1.39892700  | H | 6.85021400  | -4.05910800 | -1.79763500 |
| C | -5.57893600  | 0.64278000  | 0.40290700  | C | 7.12048400  | -1.95045800 | -1.77736900 |
| C | -5.57898800  | -0.64276000 | -0.40286500 | C | 6.69726700  | -0.73638000 | -1.22528300 |
| C | -6.69726700  | -0.73637900 | -1.22528400 | H | 7.28393200  | 0.15727900  | -1.39873400 |
| H | -7.28393100  | 0.15728000  | -1.39873600 | C | 5.57898800  | -0.64276100 | -0.40286500 |
| C | -7.12048400  | -1.95045800 | -1.77737000 | C | 5.57893600  | 0.64277900  | 0.40290700  |
| C | -6.47918200  | -3.11495500 | -1.42401100 | C | 6.69712700  | 0.73639100  | 1.22544600  |
| H | -6.85021500  | -4.05910800 | -1.79763600 | H | 7.28379000  | -0.15726400 | 1.39892700  |
| C | -5.31920600  | -3.08385200 | -0.62612200 | C | 7.12026000  | 1.95045300  | 1.77763000  |
| C | -4.65042300  | -4.31539900 | -0.22755600 | C | 6.47896100  | 3.11494900  | 1.42426200  |
| C | -5.26650600  | -5.57739800 | -0.36117500 | H | 6.84992500  | 4.05909300  | 1.79797300  |
| H | -6.27118800  | -5.64530000 | -0.75547200 | C | 5.31906800  | 3.08385200  | 0.62625000  |
| C | -4.63505400  | -6.73636700 | 0.04190100  | C | 4.65030000  | 4.31540800  | 0.22768600  |
| C | -3.35075700  | -6.68323400 | 0.60617500  | C | 5.26634200  | 5.57741300  | 0.36143300  |
| H | -2.86514400  | -7.59284600 | 0.93921500  | H | 6.27098500  | 5.64531700  | 0.75582800  |

|   |             |             |             |   |            |             |             |
|---|-------------|-------------|-------------|---|------------|-------------|-------------|
| C | -2.71923300 | -5.46811300 | 0.74994700  | C | 4.63490200 | 6.73639000  | -0.04164000 |
| H | -1.74579600 | -5.41882400 | 1.21724400  | C | 3.35066200 | 6.68325800  | -0.60604300 |
| C | -3.34262800 | -4.26900100 | 0.33761000  | H | 2.86506100 | 7.59287700  | -0.93908300 |
| C | -2.69738000 | -3.00108900 | 0.42449400  | C | 2.71918000 | 5.46813000  | -0.74994400 |
| C | -3.42235500 | -1.81053600 | 0.21836500  | H | 1.74579300 | 5.41884300  | -1.21734400 |
| C | -2.48454300 | -0.67917800 | 0.15000400  | C | 3.34256300 | 4.26901100  | -0.33760800 |
| C | -2.48454500 | 0.67915100  | -0.15037400 | C | 2.69735900 | 3.00108700  | -0.42463800 |
| C | -3.42234000 | 1.81053700  | -0.21852100 | C | 3.42234000 | 1.81053700  | -0.21852100 |
| C | -4.78359100 | 1.81854500  | 0.22337900  | C | 2.48454500 | 0.67915100  | -0.15037500 |
| C | -4.78365500 | -1.81853800 | -0.22337500 | C | 2.48454300 | -0.67917800 | 0.15000400  |
| H | -5.14191400 | 7.68850400  | 0.06176400  | C | 3.42235400 | -1.81053600 | 0.21836500  |
| H | 5.14210000  | -7.68847500 | -0.06139500 | C | 4.78365400 | -1.81853800 | -0.22337500 |
| H | 7.98348900  | -1.97462400 | -2.43187100 | C | 4.78359100 | 1.81854500  | 0.22337900  |
| H | -7.98319500 | 1.97461100  | 2.43222500  | H | 7.98319600 | 1.97461000  | 2.43222300  |

**Table S4.** Cartesian coordinates of optimized structures ((P,P)-2<sub>meso</sub>, (P,M)-2<sub>meso</sub> and (M,M)-2<sub>meso</sub>) calculated by B<sub>3</sub>LYP/6-31G(d,p) level of theory.

| (P,P)-2 <sub>rac</sub> |             |            |             |   |             |             |             |
|------------------------|-------------|------------|-------------|---|-------------|-------------|-------------|
| C                      | -1.04876000 | 1.48223900 | -0.70981200 | H | -3.99287500 | 7.91125500  | 1.86786300  |
| C                      | 0.07092900  | 0.69242400 | -0.85297900 | H | -7.35696000 | 2.16095200  | 3.16919500  |
| C                      | 1.32923600  | 1.21673300 | -0.67571800 | H | -8.42940700 | -0.74391500 | -2.26293200 |
| C                      | 1.52121500  | 2.58171500 | -0.43370900 | H | -6.08296900 | -7.00302100 | -0.90775400 |
| C                      | 0.37622800  | 3.40469300 | -0.29137300 | C | 1.04876700  | -1.48230300 | -0.70964000 |
| H                      | 0.48378500  | 4.43882100 | -0.00199600 | C | -0.07091900 | -0.69250200 | -0.85290500 |
| C                      | -0.92338200 | 2.84225700 | -0.41150700 | C | -1.32922900 | -1.21679300 | -0.67561900 |
| C                      | -2.30047300 | 3.25711900 | -0.04100000 | C | -1.52121300 | -2.58175400 | -0.43348900 |
| C                      | -2.73900300 | 4.52496200 | 0.44021700  | C | -0.37623000 | -3.40471800 | -0.29105200 |
| C                      | -2.00226300 | 5.71322900 | 0.23509400  | H | -0.48379400 | -4.43882000 | -0.00158500 |
| H                      | -1.10637400 | 5.67857300 | -0.36893300 | C | 0.92338400  | -2.84229400 | -0.41121200 |
| C                      | -2.43972500 | 6.91547500 | 0.74484000  | C | 2.30047100  | -3.25712300 | -0.04065200 |
| H                      | -1.87299100 | 7.82167000 | 0.56650100  | C | 2.73899900  | -4.52492600 | 0.44067300  |
| C                      | -3.63662600 | 6.96562600 | 1.47652800  | C | 2.00226800  | -5.71321300 | 0.23563600  |
| C                      | -4.37906400 | 5.81955900 | 1.67530800  | H | 1.10638600  | -5.67861200 | -0.36840400 |
| H                      | -5.32016100 | 5.89778100 | 2.20198900  | C | 2.43973000  | -6.91541700 | 0.74548300  |
| C                      | -3.96047600 | 4.57186400 | 1.16632600  | H | 1.87300200  | -7.82162900 | 0.56721000  |
| C                      | -4.74811600 | 3.35912800 | 1.33858400  | C | 3.63662400  | -6.96550400 | 1.47718700  |
| C                      | -5.80042900 | 3.32527900 | 2.27202700  | C | 4.37905400  | -5.81941800 | 1.67588400  |
| H                      | -5.97777800 | 4.17897900 | 2.91077100  | H | 5.32014700  | -5.89759200 | 2.20257900  |
| C                      | -6.57820000 | 2.20101800 | 2.41716400  | C | 3.96046400  | -4.57176500 | 1.16680000  |
| C                      | -6.39771400 | 1.12946900 | 1.53950000  | C | 4.74809600  | -3.35901300 | 1.33897200  |
| H                      | -7.08308600 | 0.29231100 | 1.57929300  | C | 5.80039600  | -3.32508700 | 2.27242700  |
| C                      | -5.39134000 | 1.11141000 | 0.57618800  | H | 5.97773700  | -4.17873600 | 2.91124100  |
| C                      | -5.64354100 | 0.02282100 | -0.44472300 | C | 6.57816400  | -2.20081300 | 2.41748400  |
| C                      | -6.85714200 | 0.17146200 | -1.10553500 | C | 6.39768800  | -1.12933600 | 1.53972900  |
| H                      | -7.34838900 | 1.13627500 | -1.07160600 | H | 7.08306000  | -0.29217500 | 1.57946100  |

|   |             |             |             |   |            |             |             |
|---|-------------|-------------|-------------|---|------------|-------------|-------------|
| C | -7.49614300 | -0.90361100 | -1.73639400 | C | 5.39132700 | -1.11135600 | 0.57640200  |
| C | -6.97743400 | -2.17165600 | -1.60571600 | C | 5.64354700 | -0.02285500 | -0.44459800 |
| H | -7.51699400 | -3.01139600 | -2.02127800 | C | 6.85716400 | -0.17155200 | -1.10536900 |
| C | -5.73039300 | -2.37733000 | -0.98239100 | H | 7.34841200 | -1.13636100 | -1.07134300 |
| C | -5.17987300 | -3.71375900 | -0.80418000 | C | 7.49617800 | 0.90346700  | -1.73630800 |
| C | -5.96728600 | -4.87109500 | -0.97650900 | C | 6.97746200 | 2.17152200  | -1.60575400 |
| H | -7.01318600 | -4.77397400 | -1.23397900 | H | 7.51703000 | 3.01122700  | -2.02137800 |
| C | -5.44737400 | -6.13436300 | -0.78245500 | C | 5.73040800 | 2.37724800  | -0.98247600 |
| C | -4.10468700 | -6.29518900 | -0.40683600 | C | 5.17988200 | 3.71369200  | -0.80439500 |
| H | -3.70033800 | -7.28750400 | -0.24569500 | C | 5.96729900 | 4.87101300  | -0.97680100 |
| C | -3.30656300 | -5.18653200 | -0.23290500 | H | 7.01320700 | 4.77387000  | -1.23423400 |
| H | -2.27913300 | -5.31203300 | 0.07561400  | C | 5.44738200 | 6.13429700  | -0.78286800 |
| C | -3.81565200 | -3.88234700 | -0.42200000 | C | 4.10468600 | 6.29515500  | -0.40729700 |
| C | -3.00397900 | -2.71230000 | -0.32113000 | H | 3.70033300 | 7.28748400  | -0.24624900 |
| C | -3.58532900 | -1.43461300 | -0.32790000 | C | 3.30655700 | 5.18651300  | -0.23329300 |
| C | -2.52978700 | -0.42059100 | -0.50009100 | H | 2.27911900 | 5.31204000  | 0.07519200  |
| C | -2.38826000 | 0.96001800  | -0.49445400 | C | 3.81565100 | 3.88231200  | -0.42226500 |
| C | -3.16017200 | 2.14420700  | -0.06540500 | C | 3.00397600 | 2.71227300  | -0.32131800 |
| C | -4.44840200 | 2.18613900  | 0.56665900  | C | 3.58532800 | 1.43458600  | -0.32795600 |
| C | -4.98643200 | -1.24209500 | -0.53598900 | C | 2.52979100 | 0.42054600  | -0.50008500 |
| H | 6.08298100  | 7.00294500  | -0.90822400 | C | 2.38826400 | -0.96006200 | -0.49430900 |
| H | 8.42945400  | 0.74372500  | -2.26281100 | C | 3.16016800 | -2.14421100 | -0.06513800 |
| H | 7.35691300  | -2.16068500 | 3.16952100  | C | 4.44838900 | -2.18608700 | 0.56694800  |
| H | 3.99287500  | -7.91110000 | 1.86859900  | C | 4.98643700 | 1.24205100  | -0.53599200 |

TS<sub>i</sub>

|   |             |             |             |   |             |             |             |
|---|-------------|-------------|-------------|---|-------------|-------------|-------------|
| C | -1.29714900 | -1.31680900 | -0.80376700 | H | -5.70929800 | -7.31656200 | -0.08484600 |
| C | -0.07265300 | -0.77006500 | -1.12889600 | H | -8.41153300 | -1.42682200 | -2.23778000 |
| C | 1.08400000  | -1.47209200 | -0.83770900 | H | -7.46180300 | 2.07656500  | 2.85011500  |
| C | 1.03127600  | -2.69596500 | -0.16249300 | H | -4.24935200 | 7.81480400  | 1.22546100  |
| C | -0.23011600 | -3.31272200 | 0.05137200  | C | 1.24778200  | 1.21543000  | -1.15319500 |
| H | -0.28598900 | -4.27591700 | 0.53314100  | C | 0.00551500  | 0.61915900  | -1.31463400 |
| C | -1.40883700 | -2.62082300 | -0.29168400 | C | -1.15163200 | 1.36426400  | -1.14451000 |
| C | -2.87662400 | -2.81944200 | -0.12616000 | C | -1.07803800 | 2.73155300  | -0.83860600 |
| C | -3.62033700 | -4.03661100 | -0.05122900 | C | 0.18148000  | 3.32530600  | -0.61356500 |
| C | -3.03549500 | -5.27441300 | 0.29682400  | H | 0.22960200  | 4.33919600  | -0.25041200 |
| H | -1.99659300 | -5.30422200 | 0.59047100  | C | 1.35662700  | 2.54475700  | -0.72535900 |
| C | -3.77028000 | -6.43915500 | 0.28360100  | C | 2.76741700  | 2.69679000  | -0.30159500 |
| H | -3.30646600 | -7.37780300 | 0.56272000  | C | 3.39788100  | 3.80266400  | 0.33826700  |
| C | -5.12371900 | -6.40479900 | -0.08593100 | C | 2.70034900  | 4.88212200  | 0.92798100  |
| C | -5.71615600 | -5.20984600 | -0.43920600 | H | 1.62160600  | 4.89203600  | 0.91753900  |
| H | -6.76735200 | -5.20588300 | -0.69360800 | C | 3.37575000  | 5.89042400  | 1.57945400  |
| C | -4.99463100 | -3.99816500 | -0.43479300 | H | 2.82375800  | 6.69865300  | 2.04451000  |
| C | -5.62096600 | -2.73166200 | -0.78682700 | C | 4.77601200  | 5.85191000  | 1.66875000  |
| C | -6.88265900 | -2.67615400 | -1.41353300 | C | 5.47634500  | 4.81038300  | 1.09597600  |

|   |             |             |             |   |            |             |             |
|---|-------------|-------------|-------------|---|------------|-------------|-------------|
| H | -7.38122200 | -3.59082800 | -1.70322200 | H | 6.55176800 | 4.77399800  | 1.20955600  |
| C | -7.46775600 | -1.46513500 | -1.70715900 | C | 4.81259900 | 3.76850000  | 0.41615900  |
| C | -6.88540800 | -0.28256300 | -1.23088900 | C | 5.54245400 | 2.69451500  | -0.24011900 |
| H | -7.43139300 | 0.64971100  | -1.31029800 | C | 6.83188900 | 2.98344300  | -0.70148100 |
| C | -5.66194800 | -0.28118800 | -0.57334600 | H | 7.26674900 | 3.95616700  | -0.52309900 |
| C | -5.46177600 | 0.91252600  | 0.33209300  | C | 7.46686900 | 2.07211200  | -1.50584900 |
| C | -6.47172100 | 0.96821100  | 1.29173700  | C | 6.92557500 | 0.80207400  | -1.65489800 |
| H | -7.12878500 | 0.11390600  | 1.39216000  | H | 7.53590700 | 0.13581100  | -2.23271100 |
| C | -6.68304100 | 2.08800200  | 2.09712000  | C | 5.73159100 | 0.34803900  | -1.06988200 |
| C | -5.92945400 | 3.21700900  | 1.88292900  | C | 5.63881800 | -1.17780300 | -0.91135200 |
| H | -6.12582300 | 4.10357300  | 2.46879300  | C | 6.76213300 | -1.88200400 | -1.37622400 |
| C | -4.87950100 | 3.21937500  | 0.94682500  | H | 7.44310300 | -1.42509900 | -2.06740000 |
| C | -4.13078900 | 4.44459800  | 0.70374900  | C | 7.14589900 | -3.15249800 | -0.96785900 |
| C | -4.57989800 | 5.70645500  | 1.14885700  | C | 6.41313400 | -3.79975800 | -0.00622700 |
| H | -5.51814700 | 5.78906200  | 1.67963800  | H | 6.72756700 | -4.76299900 | 0.36849000  |
| C | -3.87065500 | 6.85950800  | 0.88152200  | C | 5.17518200 | -3.26813800 | 0.37274000  |
| C | -2.68027900 | 6.80289800  | 0.13962400  | C | 4.32827800 | -4.09078600 | 1.22296500  |
| H | -2.14159700 | 7.71330500  | -0.09520600 | C | 4.86574800 | -5.05279000 | 2.10284300  |
| C | -2.21537600 | 5.58736800  | -0.31109500 | H | 5.93875900 | -5.13190900 | 2.21752000  |
| H | -1.32695400 | 5.54452700  | -0.92593700 | C | 4.04847900 | -5.86244900 | 2.86448400  |
| C | -2.91701700 | 4.39282300  | -0.03115800 | C | 2.65300900 | -5.73954200 | 2.77284800  |
| C | -2.45423200 | 3.11399800  | -0.45572500 | H | 2.01180200 | -6.36207800 | 3.38566200  |
| C | -3.26989600 | 1.97399600  | -0.41211100 | C | 2.10021500 | -4.80308900 | 1.92755700  |
| C | -2.45689100 | 0.80706900  | -0.82446600 | H | 1.02894500 | -4.67284200 | 1.90824900  |
| C | -2.53008000 | -0.56925600 | -0.68191900 | C | 2.91959000 | -3.96147500 | 1.14053100  |
| C | -3.52577300 | -1.59325900 | -0.31107800 | C | 2.42073900 | -2.93489200 | 0.28926400  |
| C | -4.93717700 | -1.50905600 | -0.51282300 | C | 3.26421500 | -1.89854100 | -0.17083100 |
| C | -4.54923900 | 2.00900800  | 0.24341100  | C | 2.40437800 | -0.87740600 | -0.78295000 |
| H | 4.48603100  | -6.57817700 | 3.55037500  | C | 2.48533500 | 0.48453000  | -0.93691900 |
| H | 8.04351300  | -3.59553000 | -1.38169500 | C | 3.47093400 | 1.49449000  | -0.53184700 |
| H | 8.40602500  | 2.31010200  | -1.99020500 | C | 4.90548700 | 1.43322500  | -0.54276700 |
| H | 5.30721100  | 6.62851400  | 2.20623700  | C | 4.69420900 | -2.02372800 | -0.18385700 |

(P,M)-2<sub>meso</sub>

|   |             |             |             |   |             |             |             |
|---|-------------|-------------|-------------|---|-------------|-------------|-------------|
| C | -1.18985200 | -1.37928800 | -0.29861900 | H | 4.83787800  | 7.69435600  | 0.49696500  |
| C | 0.00000000  | -0.75595700 | -0.57362700 | H | -5.27549800 | -7.62353100 | 0.39571100  |
| C | 1.18985200  | -1.37928800 | -0.29861900 | H | 8.25553200  | -1.98372700 | -2.02781300 |
| C | 1.23113800  | -2.70693600 | 0.13799800  | C | 1.20285500  | 1.25947100  | -0.93339900 |
| C | 0.00000000  | -3.39023100 | 0.33542700  | C | 0.00000000  | 0.58532200  | -0.94213300 |
| H | 0.00000000  | -4.42156600 | 0.65364000  | C | -1.20285500 | 1.25947100  | -0.93339900 |
| C | -1.23113800 | -2.70693600 | 0.13799800  | C | -1.23039500 | 2.65748700  | -0.89365400 |
| C | -2.69548600 | -2.98167300 | 0.25373500  | C | 0.00000000  | 3.36426500  | -0.86524200 |
| C | -3.37479800 | -4.23312200 | 0.35099000  | H | 0.00000000  | 4.43098200  | -0.69691300 |
| C | -2.73571600 | -5.41798000 | 0.77887800  | C | 1.23039500  | 2.65748700  | -0.89365400 |
| H | -1.71438100 | -5.36760900 | 1.12772400  | C | 2.64619800  | 2.98263700  | -0.57995900 |

|   |             |             |             |   |             |             |             |
|---|-------------|-------------|-------------|---|-------------|-------------|-------------|
| C | -3.40354400 | -6.62227200 | 0.79362200  | C | 3.22107700  | 4.26135300  | -0.32469100 |
| H | -2.90147100 | -7.51923100 | 1.13641900  | C | 2.61045300  | 5.46595900  | -0.74038700 |
| C | -4.74196400 | -6.68058000 | 0.37515700  | H | 1.70728100  | 5.41952100  | -1.33266800 |
| C | -5.38941600 | -5.53609200 | -0.04342600 | C | 3.17670300  | 6.68618600  | -0.44583700 |
| H | -6.43129500 | -5.60296200 | -0.32573500 | H | 2.70525800  | 7.60162200  | -0.78323800 |
| C | -4.73806500 | -4.28543200 | -0.06713500 | C | 4.38038200  | 6.73754200  | 0.27451300  |
| C | -5.42576800 | -3.06828800 | -0.47609400 | C | 5.00056700  | 5.57257300  | 0.67766300  |
| C | -6.67252500 | -3.11011900 | -1.13139900 | H | 5.94966200  | 5.64312900  | 1.19084600  |
| H | -7.10879300 | -4.06242200 | -1.39946200 | C | 4.44815200  | 4.30581700  | 0.39290300  |
| C | -7.32222300 | -1.94754700 | -1.47884500 | C | 5.10514900  | 3.06621800  | 0.78473800  |
| C | -6.81656300 | -0.71633700 | -1.04199700 | C | 6.16129100  | 3.08691300  | 1.71449700  |
| H | -7.40833900 | 0.18044300  | -1.17969800 | H | 6.43955500  | 4.01711800  | 2.18935400  |
| C | -5.60904500 | -0.61522800 | -0.36157300 | C | 6.81528600  | 1.92939600  | 2.06451000  |
| C | -5.49108800 | 0.66010300  | 0.44623400  | C | 6.50735000  | 0.74239700  | 1.39533900  |
| C | -6.50735000 | 0.74239800  | 1.39533900  | H | 7.09937400  | -0.14305000 | 1.58961000  |
| H | -7.09937400 | -0.14305000 | 1.58961000  | C | 5.49108800  | 0.66010200  | 0.44623400  |
| C | -6.81528600 | 1.92939600  | 2.06451000  | C | 5.60904500  | -0.61522900 | -0.36157300 |
| C | -6.16129000 | 3.08691400  | 1.71449800  | C | 6.81656300  | -0.71633700 | -1.04199700 |
| H | -6.43955500 | 4.01711800  | 2.18935400  | H | 7.40833900  | 0.18044300  | -1.17969800 |
| C | -5.10514900 | 3.06621900  | 0.78473800  | C | 7.32222200  | -1.94754800 | -1.47884500 |
| C | -4.44815100 | 4.30581700  | 0.39290400  | C | 6.67252500  | -3.11012000 | -1.13139900 |
| C | -5.00056600 | 5.57257300  | 0.67766400  | H | 7.10879300  | -4.06242200 | -1.39946100 |
| H | -5.94966100 | 5.64312900  | 1.19084700  | C | 5.42576800  | -3.06828800 | -0.47609400 |
| C | -4.38038200 | 6.73754200  | 0.27451300  | C | 4.73806500  | -4.28543200 | -0.06713500 |
| C | -3.17670300 | 6.68618600  | -0.44583700 | C | 5.38941600  | -5.53609300 | -0.04342600 |
| H | -2.70525800 | 7.60162200  | -0.78323700 | H | 6.43129500  | -5.60296300 | -0.32573500 |
| C | -2.61045300 | 5.46595900  | -0.74038700 | C | 4.74196400  | -6.68058100 | 0.37515700  |
| H | -1.70728000 | 5.41952100  | -1.33266800 | C | 3.40354300  | -6.62227300 | 0.79362200  |
| C | -3.22107700 | 4.26135300  | -0.32469100 | H | 2.90147000  | -7.51923100 | 1.13641900  |
| C | -2.64619800 | 2.98263800  | -0.57995900 | C | 2.73571600  | -5.41798000 | 0.77887800  |
| C | -3.37931400 | 1.79833600  | -0.38958100 | H | 1.71438100  | -5.36760900 | 1.12772400  |
| C | -2.47811500 | 0.64700900  | -0.58823200 | C | 3.37479800  | -4.23312200 | 0.35099000  |
| C | -2.47338900 | -0.71252700 | -0.30582200 | C | 2.69548600  | -2.98167300 | 0.25373500  |
| C | -3.41421600 | -1.79541200 | 0.02708500  | C | 3.41421600  | -1.79541200 | 0.02708500  |
| C | -4.82075200 | -1.79846500 | -0.22543100 | C | 2.47338900  | -0.71252700 | -0.30582200 |
| C | -4.67135100 | 1.81285500  | 0.23579100  | C | 2.47811500  | 0.64700900  | -0.58823200 |
| H | -8.25553300 | -1.98372600 | -2.02781300 | C | 3.37931400  | 1.79833600  | -0.38958100 |
| H | 5.27549700  | -7.62353100 | 0.39571200  | C | 4.67135200  | 1.81285500  | 0.23579100  |
| H | 7.59657400  | 1.94172000  | 2.81490200  | C | 4.82075200  | -1.79846500 | -0.22543100 |
| H | -7.59657300 | 1.94172000  | 2.81490300  | H | -4.83787700 | 7.69435600  | 0.49696500  |

TS<sub>2</sub>

|   |             |             |             |   |             |             |             |
|---|-------------|-------------|-------------|---|-------------|-------------|-------------|
| C | -1.08400000 | -1.47209300 | -0.83771000 | H | 4.24935100  | 7.81480500  | 1.22546000  |
| C | 0.07265300  | -0.77006500 | -1.12889700 | H | -4.48602700 | -6.57817600 | 3.55037700  |
| C | 1.29714900  | -1.31680900 | -0.80376800 | H | 8.41153500  | -1.42681900 | -2.23777700 |

|   |             |             |             |   |             |             |             |
|---|-------------|-------------|-------------|---|-------------|-------------|-------------|
| C | 1.40883800  | -2.62082300 | -0.29168600 | C | 1.15163200  | 1.36426500  | -1.14451100 |
| C | 0.23011700  | -3.31272200 | 0.05137200  | C | -0.00551500 | 0.61915900  | -1.31463600 |
| H | 0.28599000  | -4.27591700 | 0.53314100  | C | -1.24778200 | 1.21543000  | -1.15319600 |
| C | -1.03127500 | -2.69596600 | -0.16249400 | C | -1.35662700 | 2.54475700  | -0.72536000 |
| C | -2.42073800 | -2.93489300 | 0.28926400  | C | -0.18148100 | 3.32530500  | -0.61356700 |
| C | -2.91958900 | -3.96147500 | 1.14053100  | H | -0.22960300 | 4.33919600  | -0.25041400 |
| C | -2.10021300 | -4.80308900 | 1.92755800  | C | 1.07803700  | 2.73155300  | -0.83860800 |
| H | -1.02894300 | -4.67284000 | 1.90824900  | C | 2.45423100  | 3.11399800  | -0.45572600 |
| C | -2.65300600 | -5.73954100 | 2.77284900  | C | 2.91701600  | 4.39282300  | -0.03115900 |
| H | -2.01179900 | -6.36207700 | 3.38566400  | C | 2.21537500  | 5.58736800  | -0.31109700 |
| C | -4.04847600 | -5.86244900 | 2.86448600  | H | 1.32695300  | 5.54452700  | -0.92594000 |
| C | -4.86574600 | -5.05279000 | 2.10284500  | C | 2.68027800  | 6.80289800  | 0.13962200  |
| H | -5.93875700 | -5.13190900 | 2.21752200  | H | 2.14159600  | 7.71330500  | -0.09520800 |
| C | -4.32827600 | -4.09078600 | 1.22296600  | C | 3.87065400  | 6.85950800  | 0.88152100  |
| C | -5.17518100 | -3.26813900 | 0.37274100  | C | 4.57989600  | 5.70645600  | 1.14885700  |
| C | -6.41313300 | -3.79975900 | -0.00622500 | H | 5.51814400  | 5.78906300  | 1.67963800  |
| H | -6.72756500 | -4.76300000 | 0.36849300  | C | 4.13078700  | 4.44459900  | 0.70374900  |
| C | -7.14589800 | -3.15250000 | -0.96785700 | C | 4.87949800  | 3.21937500  | 0.94682600  |
| C | -6.76213300 | -1.88200600 | -1.37622200 | C | 5.92944900  | 3.21700900  | 1.88293300  |
| H | -7.44310300 | -1.42510100 | -2.06739900 | H | 6.12581700  | 4.10357200  | 2.46879700  |
| C | -5.63881800 | -1.17780400 | -0.91135100 | C | 6.68303600  | 2.08800200  | 2.09712500  |
| C | -5.73159100 | 0.34803800  | -1.06988200 | C | 6.47171800  | 0.96821200  | 1.29174100  |
| C | -6.92557600 | 0.80207300  | -1.65489800 | H | 7.12878100  | 0.11390600  | 1.39216400  |
| H | -7.53590800 | 0.13580900  | -2.23271000 | C | 5.46177400  | 0.91252700  | 0.33209500  |
| C | -7.46687000 | 2.07211100  | -1.50584800 | C | 5.66194800  | -0.28118700 | -0.57334500 |
| C | -6.83189000 | 2.98344200  | -0.70148100 | C | 6.88540800  | -0.28256000 | -1.23088700 |
| H | -7.26674900 | 3.95616500  | -0.52309800 | H | 7.43139300  | 0.64971400  | -1.31029500 |
| C | -5.54245400 | 2.69451400  | -0.24011900 | C | 7.46775700  | -1.46513200 | -1.70715700 |
| C | -4.81259900 | 3.76849900  | 0.41615900  | C | 6.88266100  | -2.67615100 | -1.41353200 |
| C | -5.47634500 | 4.81038200  | 1.09597500  | H | 7.38122400  | -3.59082500 | -1.70322100 |
| H | -6.55176800 | 4.77399700  | 1.20955600  | C | 5.62096800  | -2.73166000 | -0.78682700 |
| C | -4.77601200 | 5.85191000  | 1.66875000  | C | 4.99463300  | -3.99816400 | -0.43479400 |
| C | -3.37575100 | 5.89042300  | 1.57945300  | C | 5.71615800  | -5.20984400 | -0.43920700 |
| H | -2.82375800 | 6.69865200  | 2.04450900  | H | 6.76735300  | -5.20588100 | -0.69360900 |
| C | -2.70035000 | 4.88212100  | 0.92798100  | C | 5.12372100  | -6.40479800 | -0.08593300 |
| H | -1.62160600 | 4.89203500  | 0.91753800  | C | 3.77028200  | -6.43915400 | 0.28359800  |
| C | -3.39788200 | 3.80266300  | 0.33826600  | H | 3.30646800  | -7.37780300 | 0.56271600  |
| C | -2.76741700 | 2.69678900  | -0.30159600 | C | 3.03549600  | -5.27441200 | 0.29682100  |
| C | -3.47093400 | 1.49448900  | -0.53184800 | H | 1.99659400  | -5.30422200 | 0.59046700  |
| C | -2.48533500 | 0.48452900  | -0.93691900 | C | 3.62033800  | -4.03661000 | -0.05123000 |
| C | -2.40437800 | -0.87740600 | -0.78295100 | C | 2.87662500  | -2.81944100 | -0.12616100 |
| C | -3.26421500 | -1.89854200 | -0.17083100 | C | 3.52577400  | -1.59325800 | -0.31107800 |
| C | -4.69420900 | -2.02372900 | -0.18385700 | C | 2.53008100  | -0.56925600 | -0.68192000 |
| C | -4.90548800 | 1.43322400  | -0.54276700 | C | 2.45689100  | 0.80706900  | -0.82446700 |

|                        |             |             |             |   |             |             |             |
|------------------------|-------------|-------------|-------------|---|-------------|-------------|-------------|
| H                      | -8.04351300 | -3.59553200 | -1.38169300 | C | 3.26989600  | 1.97399700  | -0.41211200 |
| H                      | 5.70930100  | -7.31656100 | -0.08484900 | C | 4.54923700  | 2.00900900  | 0.24341200  |
| H                      | 7.46179600  | 2.07656500  | 2.85012200  | C | 4.93717700  | -1.50905400 | -0.51282300 |
| H                      | -8.40602700 | 2.31010000  | -1.99020400 | H | -5.30721100 | 6.62851400  | 2.20623700  |
| (M,M)-2 <sub>rac</sub> |             |             |             |   |             |             |             |
| C                      | 1.04868200  | 1.48234400  | -0.70996200 | H | -3.99188900 | -7.9114600  | 1.86923100  |
| C                      | -0.07096300 | 0.69245800  | -0.85311800 | H | 3.99188900  | 7.9114600   | 1.86923400  |
| C                      | -1.32929800 | 1.21668900  | -0.67582100 | H | -8.42920600 | 0.74319400  | -2.26338300 |
| C                      | -1.52136200 | 2.58163900  | -0.43365800 | C | -1.04868200 | -1.48234400 | -0.70996300 |
| C                      | -0.37644100 | 3.40467300  | -0.29121100 | C | 0.07096300  | -0.69245700 | -0.85311800 |
| H                      | -0.48403900 | 4.43876100  | -0.00168500 | C | 1.32929800  | -1.21668900 | -0.67582100 |
| C                      | 0.92320200  | 2.84232800  | -0.41147400 | C | 1.52136200  | -2.58163900 | -0.43365800 |
| C                      | 2.30025300  | 3.25723600  | -0.04085200 | C | 0.37644100  | -3.40467300 | -0.29121200 |
| C                      | 2.73863400  | 4.52504800  | 0.44062100  | H | 0.48403900  | -4.43876100 | -0.00168600 |
| C                      | 2.00182900  | 5.71328500  | 0.23558200  | C | -0.92320200 | -2.84232800 | -0.41147500 |
| H                      | 1.10605200  | 5.67865800  | -0.36860800 | C | -2.30025300 | -3.25723600 | -0.04085400 |
| C                      | 2.43907700  | 6.91547400  | 0.74564900  | C | -2.73863400 | -4.52504800 | 0.44062000  |
| H                      | 1.87230400  | 7.82164900  | 0.56735400  | C | -2.00182900 | -5.71328500 | 0.23558000  |
| C                      | 3.63581600  | 6.96557800  | 1.47759200  | H | -1.10605200 | -5.67865800 | -0.36861000 |
| C                      | 4.37833000  | 5.81954100  | 1.67627100  | C | -2.43907700 | -6.91547400 | 0.74564700  |
| H                      | 5.31929200  | 5.89776900  | 2.20318200  | H | -1.87230400 | -7.82165000 | 0.56735200  |
| C                      | 3.95998600  | 4.57191200  | 1.16692800  | C | -3.63581600 | -6.96557900 | 1.47759000  |
| C                      | 4.74776400  | 3.35922200  | 1.33896900  | C | -4.37833000 | -5.81954200 | 1.67626800  |
| C                      | 5.80011600  | 3.32532500  | 2.27236800  | H | -5.31929200 | -5.89777000 | 2.20318000  |
| H                      | 5.97739700  | 4.17891400  | 2.91126900  | C | -3.95998700 | -4.57191200 | 1.16692600  |
| C                      | 6.57806800  | 2.20115700  | 2.41724900  | C | -4.74776400 | -3.35922300 | 1.33896700  |
| C                      | 6.39769200  | 1.12974100  | 1.53940300  | C | -5.80011600 | -3.32532600 | 2.27236600  |
| H                      | 7.08317600  | 0.29267200  | 1.57903600  | H | -5.97739800 | -4.17891500 | 2.91126700  |
| C                      | 5.39126400  | 1.11172600  | 0.57615600  | C | -6.57806800 | -2.20115800 | 2.41724700  |
| C                      | 5.64348900  | 0.02325100  | -0.44486400 | C | -6.39769200 | -1.12974100 | 1.53940100  |
| C                      | 6.85697600  | 0.17201500  | -1.10579000 | H | -7.08317600 | -0.29267300 | 1.57903400  |
| H                      | 7.34819300  | 1.13684200  | -1.07189700 | C | -5.39126400 | -1.11172600 | 0.57615500  |
| C                      | 7.49603500  | -0.90302300 | -1.73672200 | C | -5.64348900 | -0.02325100 | -0.44486500 |
| C                      | 6.97749100  | -2.17110600 | -1.60595700 | C | -6.85697600 | -0.17201400 | -1.10579200 |
| H                      | 7.51703800  | -3.01082000 | -2.02158700 | H | -7.34819300 | -1.13684200 | -1.07189900 |
| C                      | 5.73050100  | -2.37689100 | -0.98250400 | C | -7.49603400 | 0.90302400  | -1.73672300 |
| C                      | 5.18010200  | -3.71336600 | -0.80431000 | C | -6.97749100 | 2.17110700  | -1.60595800 |
| C                      | 5.96763400  | -4.87061900 | -0.97664700 | H | -7.51703800 | 3.01082000  | -2.02158800 |
| H                      | 7.01353400  | -4.77336500 | -1.23406400 | C | -5.73050100 | 2.37689100  | -0.98250500 |
| C                      | 5.44782100  | -6.13393700 | -0.78267200 | C | -5.18010100 | 3.71336600  | -0.80431000 |
| C                      | 4.10511400  | -6.29488800 | -0.40715900 | C | -5.96763400 | 4.87061900  | -0.97664700 |
| H                      | 3.70082400  | -7.28724100 | -0.24612700 | H | -7.01353400 | 4.77336500  | -1.23406400 |
| C                      | 3.30688200  | -5.18630900 | -0.23321600 | C | -5.44782000 | 6.13393700  | -0.78267200 |
| H                      | 2.27942900  | -5.31192800 | 0.07518400  | C | -4.10511400 | 6.29488800  | -0.40715900 |

|   |             |             |             |   |              |             |             |
|---|-------------|-------------|-------------|---|--------------|-------------|-------------|
| C | 3.81588700  | -3.88207400 | -0.42218100 | H | -3.70082400  | 7.28724100  | -0.24612600 |
| C | 3.00414100  | -2.71208700 | -0.32125900 | C | -3.30688200  | 5.18630900  | -0.23321600 |
| C | 3.58539700  | -1.43437000 | -0.32795100 | H | -2.27942900  | 5.31192800  | 0.07518500  |
| C | 2.52977700  | -0.42041500 | -0.50017900 | C | -3.581588700 | 3.88207400  | -0.42218100 |
| C | 2.38818700  | 0.96019000  | -0.49455100 | C | -3.00414100  | 2.71208700  | -0.32125900 |
| C | 3.16001000  | 2.14439800  | -0.06531900 | C | -3.58539700  | 1.43437000  | -0.32795200 |
| C | 4.44821200  | 2.18634200  | 0.56681100  | C | -2.52977700  | 0.42041500  | -0.50017900 |
| C | 4.98648200  | -1.24175200 | -0.53606200 | C | -2.38818700  | -0.96019000 | -0.49455200 |
| H | 7.35688200  | 2.16107200  | 3.16922100  | C | -3.16001000  | -2.14439800 | -0.06532100 |
| H | -6.08349300 | 7.00253900  | -0.90795800 | C | -4.44821300  | -2.18634200 | 0.56681000  |
| H | -7.35688200 | -2.16107300 | 3.16921900  | C | -4.98648200  | 1.24175300  | -0.53606200 |
| H | 8.42920600  | -0.74319400 | -2.26338100 | H | 6.08349400   | -7.00253900 | -0.90795800 |

**Table S5.** TD-DFT singlet excitation energies  $E$ , excitation wavelengths  $\lambda$ , oscillator strengths  $f$ , and orbital contributions of  $\mathbf{2}_{\text{meso}}$  at the B3LYP/6-31G(d,p) level in  $\text{CHCl}_3$  solution.

| Excited state   | Energy (eV) | Wavelength (nm) | $f$     | Contributions                                                                             |
|-----------------|-------------|-----------------|---------|-------------------------------------------------------------------------------------------|
| S <sub>1</sub>  | 1.3266      | 934.60          | 0.00000 | HOMO→LUMO: 99.4%                                                                          |
| S <sub>5</sub>  | 2.1640      | 572.94          | 0.40150 | HOMO-4→LUMO: 95.8%                                                                        |
| S <sub>7</sub>  | 2.4517      | 505.71          | 0.16600 | HOMO-6→LUMO: 80.1%<br>HOMO→LUMO+1: 11.2%                                                  |
| S <sub>8</sub>  | 2.5256      | 490.91          | 0.12210 | HOMO→LUMO+1: 83.1%<br>HOMO-6→LUMO: 13.2%                                                  |
| S <sub>10</sub> | 2.6264      | 472.07          | 0.10060 | HOMO-1→LUMO+1: 51.5%<br>HOMO-8→LUMO: 46.4%                                                |
| S <sub>13</sub> | 2.8218      | 439.38          | 0.84240 | HOMO-8→LUMO: 49.4%<br>HOMO-1→LUMO+1: 42.4%                                                |
| S <sub>17</sub> | 3.1517      | 393.39          | 1.14030 | HOMO-2→LUMO+2: 84.1%<br>HOMO-9→LUMO: 6.0%                                                 |
| S <sub>23</sub> | 3.3504      | 370.06          | 0.27060 | HOMO→LUMO+3: 45.5%<br>HOMO-4→LUMO+2: 13.3%<br>HOMO-13→LUMO: 12.9%<br>HOMO-2→LUMO+5: 7.1%  |
| S <sub>24</sub> | 3.3666      | 368.28          | 0.16840 | HOMO→LUMO+4: 31.0%<br>HOMO-1→LUMO+3: 30.4%<br>HOMO-5→LUMO+1: 18.7%<br>HOMO-2→LUMO+6: 5.4% |
| S <sub>31</sub> | 3.5310      | 351.13          | 0.46330 | HOMO-4→LUMO+2: 63.4%<br>HOMO→LUMO+3: 23.3%<br>HOMO→LUMO+5: 6.3%                           |

**Table S6.** TD-DFT singlet excitation energies  $E$ , excitation wavelengths  $\lambda$ , oscillator strengths  $f$ , and orbital contributions of  $\mathbf{2}_{\text{rac}}$  at the B3LYP/6-31G(d,p) level in  $\text{CHCl}_3$  solution.



| Excited state   | Energy (eV) | Wavelength (nm) | <i>f</i> | Contributions                                                                                                    |
|-----------------|-------------|-----------------|----------|------------------------------------------------------------------------------------------------------------------|
| S <sub>1</sub>  | 1.3446      | 922.09          | 0.00000  | HOMO→LUMO: 99.2%                                                                                                 |
| S <sub>5</sub>  | 2.1851      | 567.41          | 0.38620  | HOMO-4→LUMO: 94.5%                                                                                               |
| S <sub>7</sub>  | 2.4728      | 501.39          | 0.15550  | HOMO-6→LUMO: 77.7%<br>HOMO→LUMO+1: 12.9%                                                                         |
| S <sub>8</sub>  | 2.5368      | 488.74          | 0.12480  | HOMO→LUMO+1: 80.9%<br>HOMO-6→LUMO: 15.1%                                                                         |
| S <sub>14</sub> | 2.8427      | 436.15          | 0.86640  | HOMO-8→LUMO: 47.3%<br>HOMO-1→LUMO+1: 43.7%                                                                       |
| S <sub>17</sub> | 3.1489      | 393.74          | 1.18150  | HOMO-2→LUMO+2: 86.5%<br>HOMO-9→LUMO: 6.5%                                                                        |
| S <sub>21</sub> | 3.3459      | 370.56          | 0.34980  | HOMO→LUMO+3: 47.7%<br>HOMO-4→LUMO+2: 11.3%<br>HOMO→LUMO+4: 8.5%<br>HOMO-2→LUMO+5: 6.7%<br>HOMO-3→LUMO+2: 6.0%    |
| S <sub>24</sub> | 3.3714      | 367.75          | 0.17000  | HOMO→LUMO+4: 33.0%<br>HOMO-1→LUMO+3: 23.2%<br>HOMO-5→LUMO+1: 17.8%<br>HOMO-2→LUMO+6: 5.6%<br>HOMO-1→LUMO+4: 5.1% |
| S <sub>30</sub> | 3.5174      | 352.49          | 0.20710  | HOMO-4→LUMO+2: 45.6%<br>HOMO-1→LUMO+4: 18.6%<br>HOMO-3→LUMO+2: 15.6%<br>HOMO→LUMO+3: 9.1%                        |
| S <sub>31</sub> | 3.5427      | 349.97          | 0.25480  | HOMO-4→LUMO+2: 26.6%<br>HOMO-1→LUMO+4: 25.3%<br>HOMO→LUMO+4: 23.0%<br>HOMO-3→LUMO+2: 6.1%                        |

## 5. Chiral HPLC Analysis and Thermal Isomerization of **2<sub>meso</sub>** and **2<sub>rac</sub>**

HPLC analysis was conducted on a Shimadzu LC-20A instrument equipped with equipped with a CHIRALPAK® IF column (eluent: n-hexane/dichloromethane = 93:7, 2.0 mL·min<sup>-1</sup>, 25 °C, Detector: PDA Multi 525nm 4nm).

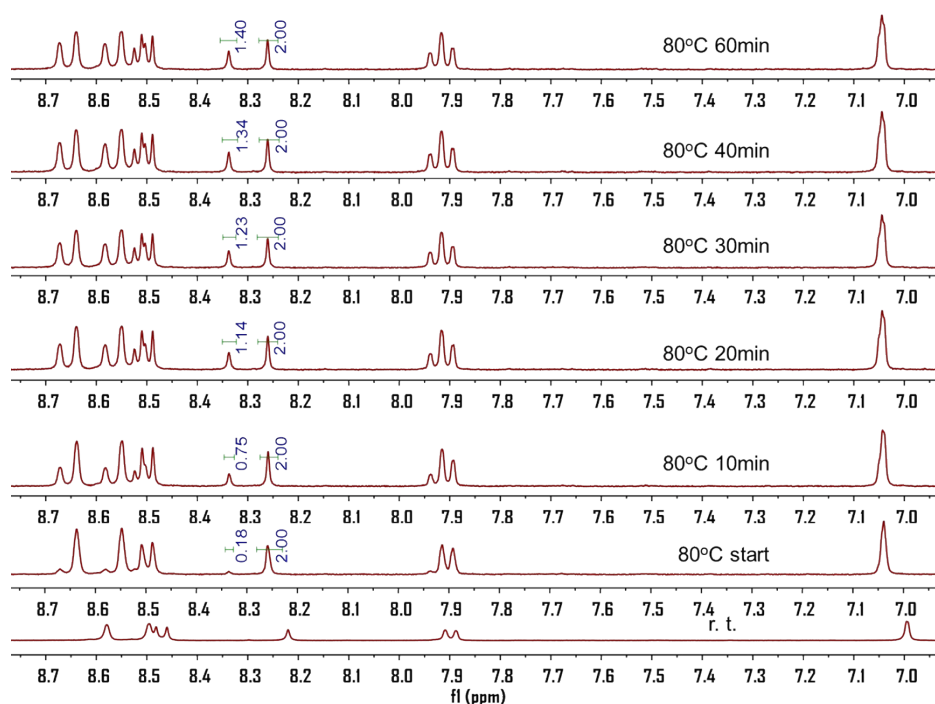

**Fig. S6** Selected  $^1\text{H}$  NMR spectra of during the progress of thermal  $2_{\text{meso}}$  to  $2_{\text{rac}}$  isomerization in 1,1,2,2-tetrachloroethane- $d_2$  at 80 °C.

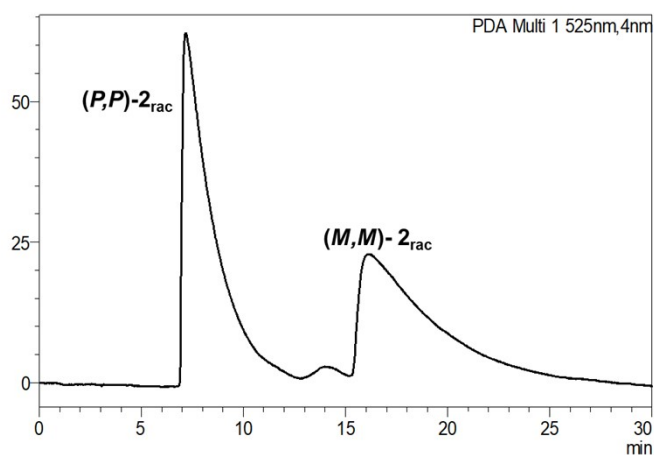

**Fig. S7** The HPLC analysis spectra of  $2_{\text{rac}}$ .

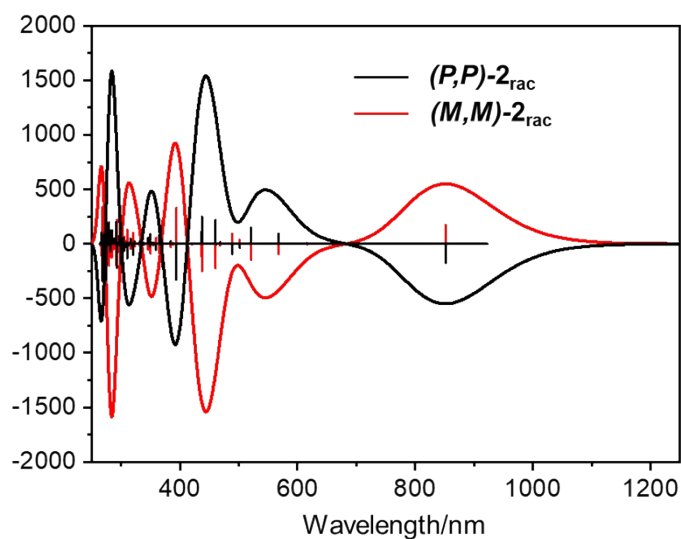

**Fig. S8** Calculated CD spectra of  $(P,P)$ - $2_{\text{rac}}$  and  $(M,M)$ - $2_{\text{rac}}$  at the B<sub>3</sub>LYP/6-311G(d,p) level in CHCl<sub>3</sub> solution.

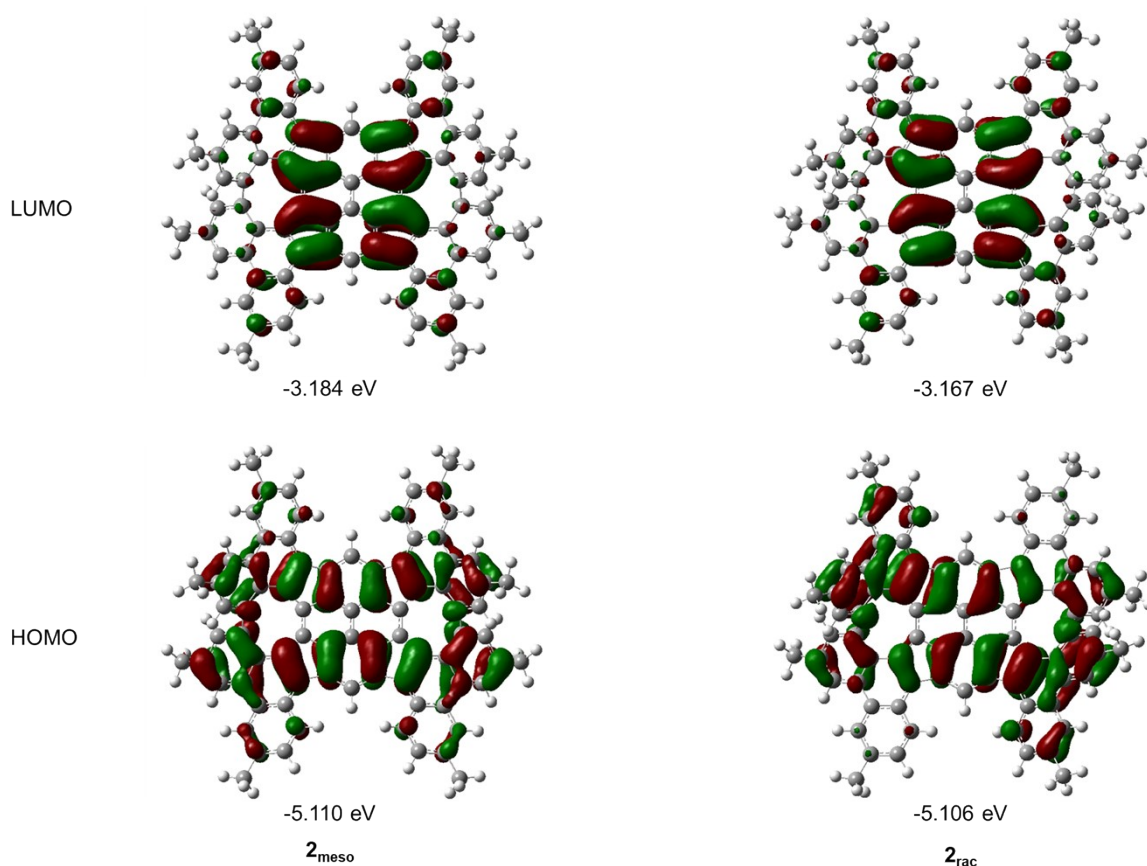

**Fig. S9** Frontier orbitals and frontier orbital energies of  $2_{\text{meso}}$  and  $2_{\text{rac}}$  at the optimized  $S_0$  geometry at the B<sub>3</sub>LYP/6-311G(d,p) level.

## 6. Binding Behaviors

The association behaviors of  $2_{\text{meso}}$  and guest were analyzed by NMR titrations. A deuterium solution of  $2_{\text{meso}}$  ( $4.0 \times 10^{-4}$  M) and a solution of guest ( $4.0 \times 10^{-4}$  M) were prepared. The solutions were mixed with different ratios.

A solution of  $2_{\text{meso}}$  at a concentration of approximately. Those solutions were utilized as solvents in the guest solution, to ensure working at constant concentration of host. Nonlinear curve regression of  $2_{\text{meso}}$  upon addition of guest by using 1:1 binding model associated with the program BindFit<sup>10</sup>.

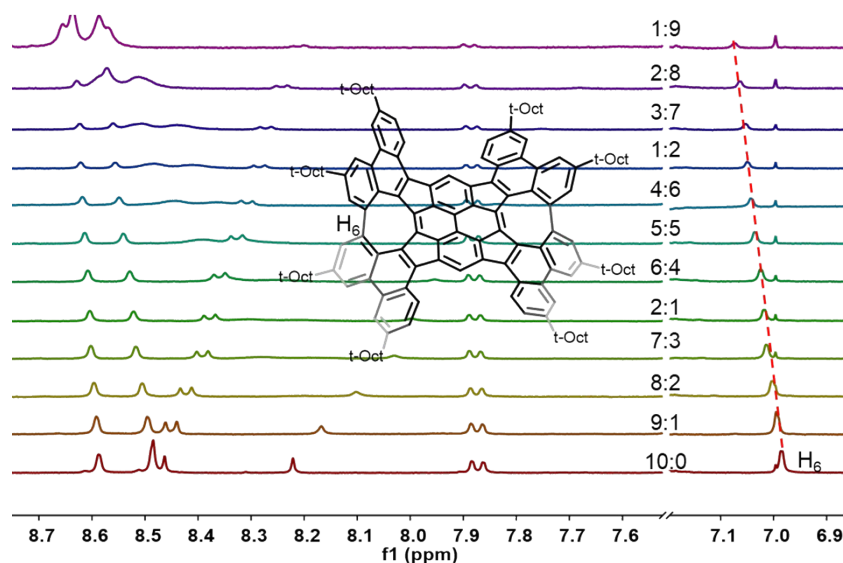

**Fig. S10** Part of the <sup>1</sup>H NMR spectra of  $2_{\text{meso}}$  and PDI mixed in different ratio in Chloroform-*d* at 298 K (total concentration of  $4.0 \times 10^{-4}$  M).

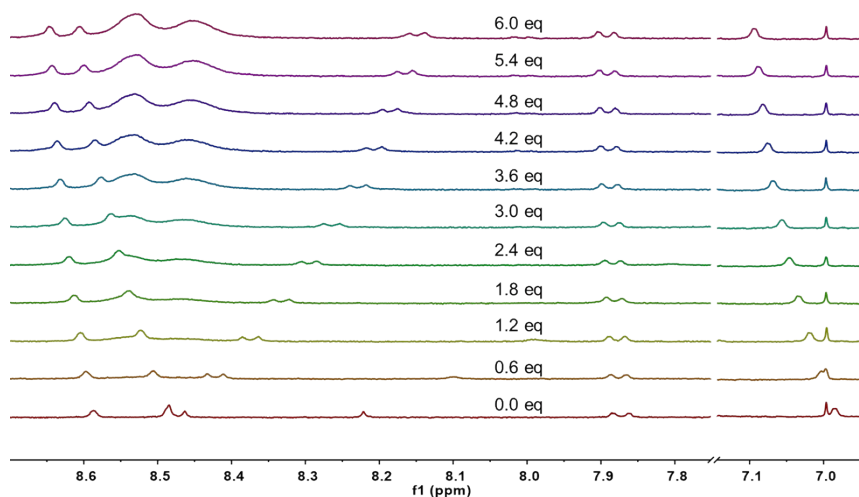

**Fig. S11** Part of the  $^1\text{H}$  NMR spectra of  $2_{\text{meso}}$  titration with PDI. The concentration  $[2_{\text{meso}}]$  was kept to be  $1.0 \times 10^{-4}$  M for all entries and the concentration  $[\text{PDI}]$  was changed from 0.0 to  $6.0 \times 10^{-4}$  M. (400MHz, Chloroform- $d$ , 298 K).

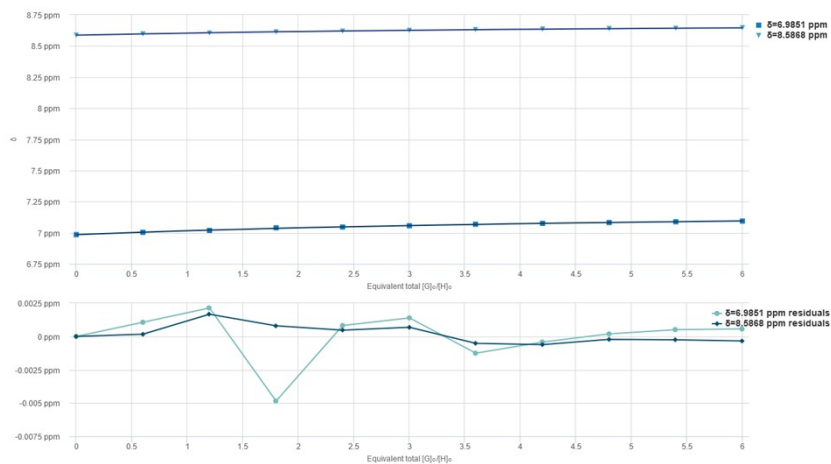

**Fig. S12** Nonlinear curve regression of protons of  $2_{\text{meso}}$  upon addition of PDI by using 1:1 binding model associated with the program BindFit<sup>10</sup>.

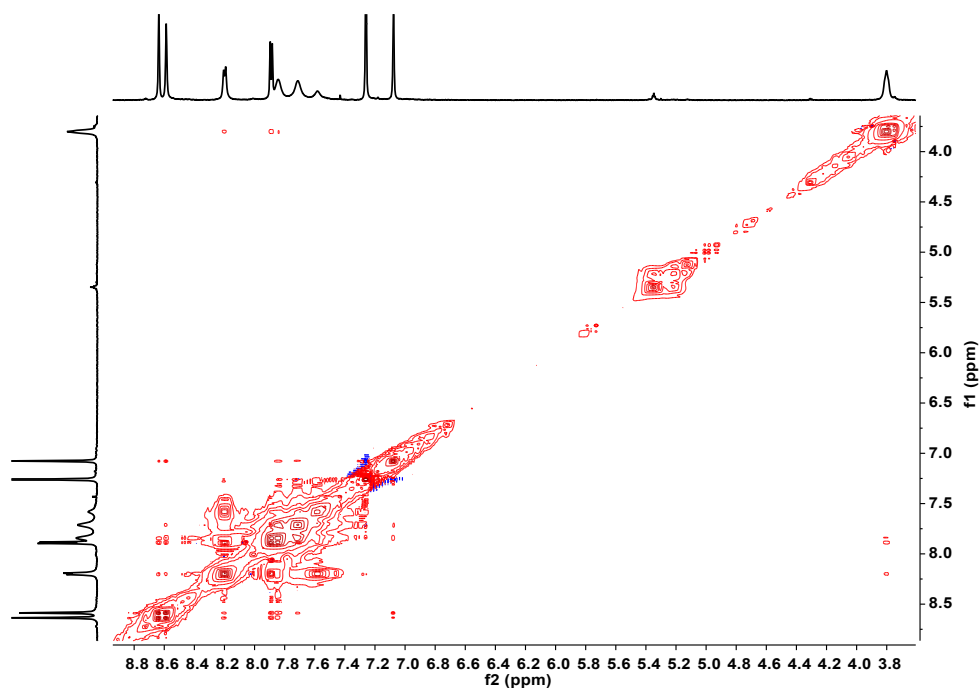

**Fig. S13** 2D  $^1\text{H}$ - $^1\text{H}$  NOESY NMR spectrum of  $2_{\text{meso}}$  and PDI (600 MHz, Chloroform- $d$ , 298 K).

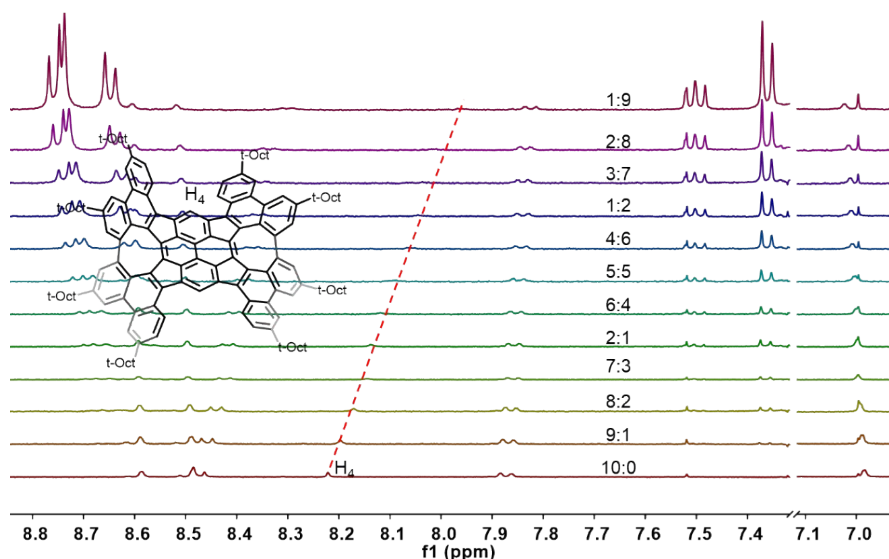

**Fig. S14** Part of the  $^1\text{H}$  NMR spectra of  $\mathbf{2}_{\text{meso}}$  and TDI mixed in different ratio in Chloroform- $d$  at 298 K (total concentration of  $4.0 \times 10^{-4}$  M).

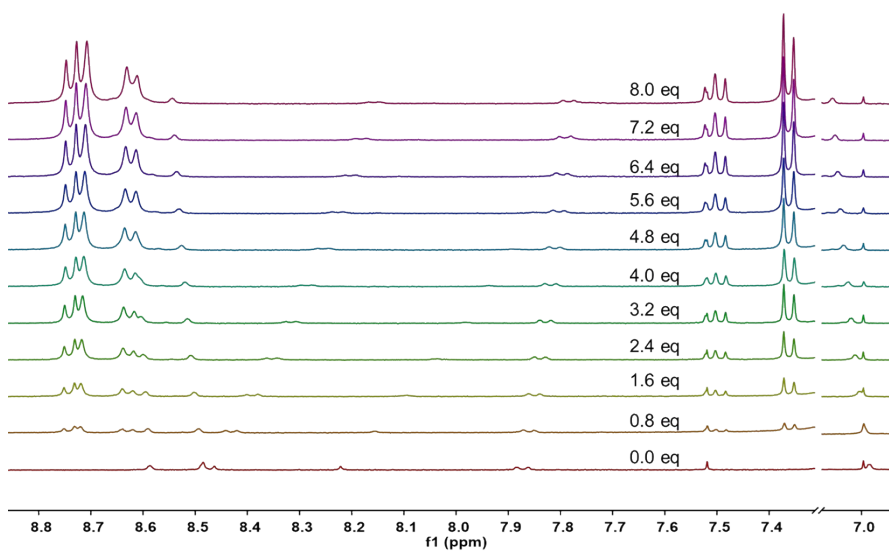

**Fig. S15** Part of the  $^1\text{H}$  NMR spectra of  $\mathbf{2}_{\text{meso}}$  titration with TDI. The concentration  $[\mathbf{2}_{\text{meso}}]$  was kept to be  $1.0 \times 10^{-4}$  M for all entries and the concentration  $[\text{TDI}]$  was changed from 0.0 to  $8.0 \times 10^{-4}$  M. (400MHz, Chloroform- $d$ , 298 K).

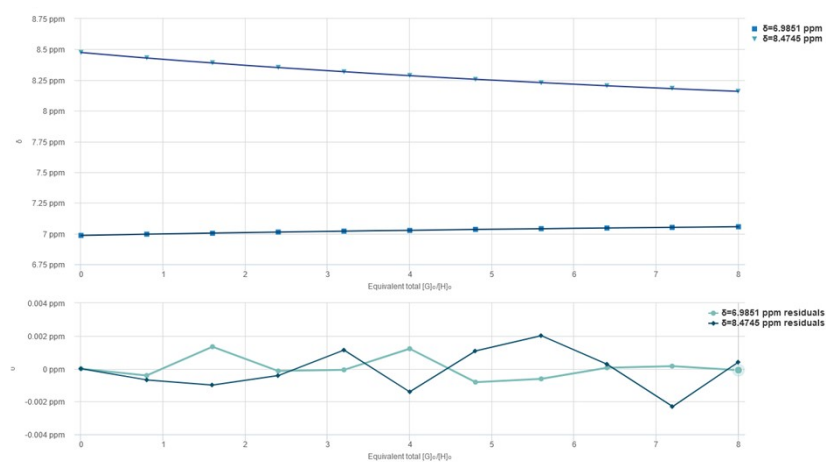

**Fig. S16** Nonlinear curve regression of  $\mathbf{2}_{\text{meso}}$  upon addition of TDI by using 1:1 binding model associated with the program BindFit<sup>10</sup>.

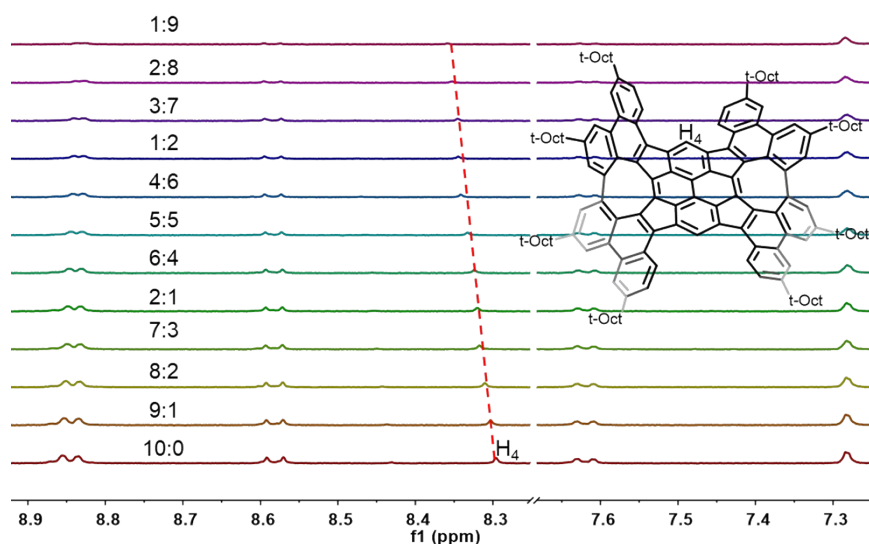

**Fig. S17** Part of the  $^1\text{H}$  NMR spectra of  $z_{\text{meso}}$  and  $\text{C}_{60}$  mixed in different ratio in toluene- $d_8$  at 298 K (total concentration of  $4.0 \times 10^{-4}$  M).

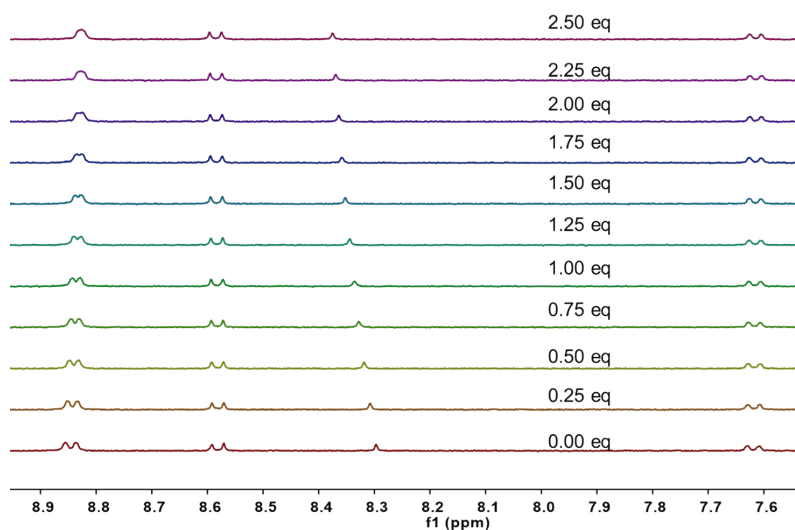

**Fig. S18** Part of the  $^1\text{H}$  NMR spectra of  $z_{\text{meso}}$  titration with  $\text{C}_{60}$ . The concentration  $[z_{\text{meso}}]$  was kept to be  $2.0 \times 10^{-4}$  M for all entries and the concentration  $[\text{C}_{60}]$  was changed from 0.0 to  $5.0 \times 10^{-4}$  M. (400MHz, toluene- $d_8$ , 298 K).

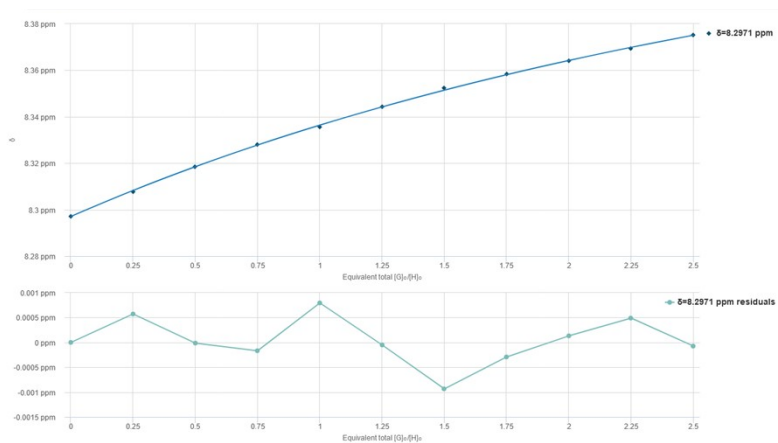

**Fig. S19** Nonlinear curve regression of  $z_{\text{meso}}$  upon addition of  $\text{C}_{60}$  by using 1:1 binding model associated with the program BindFit<sup>®</sup>.

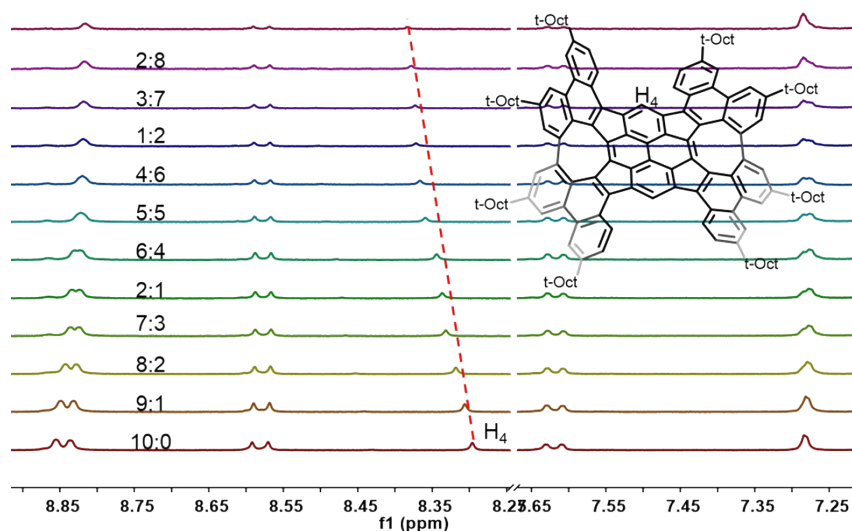

**Fig. S20** Part of the  $^1\text{H}$  NMR spectra of  $z_{\text{meso}}$  and  $C_{70}$  mixed in different ratio in toluene- $d_8$  at 298 K (total concentration of  $4.0 \times 10^{-4}$  M).

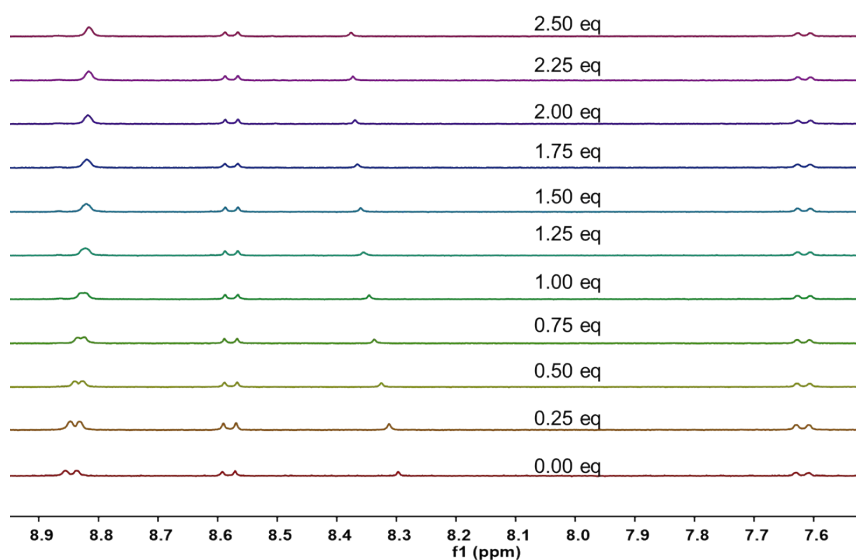

**Fig. S21** Part of the  $^1\text{H}$  NMR spectra of  $z_{\text{meso}}$  titration with  $C_{70}$ . The concentration  $[z_{\text{meso}}]$  was kept to be  $2.0 \times 10^{-4}$  M for all entries and the concentration  $[C_{70}]$  was changed from 0.0 to  $5.0 \times 10^{-4}$  M. (400MHz, toluene- $d_8$ , 298 K).

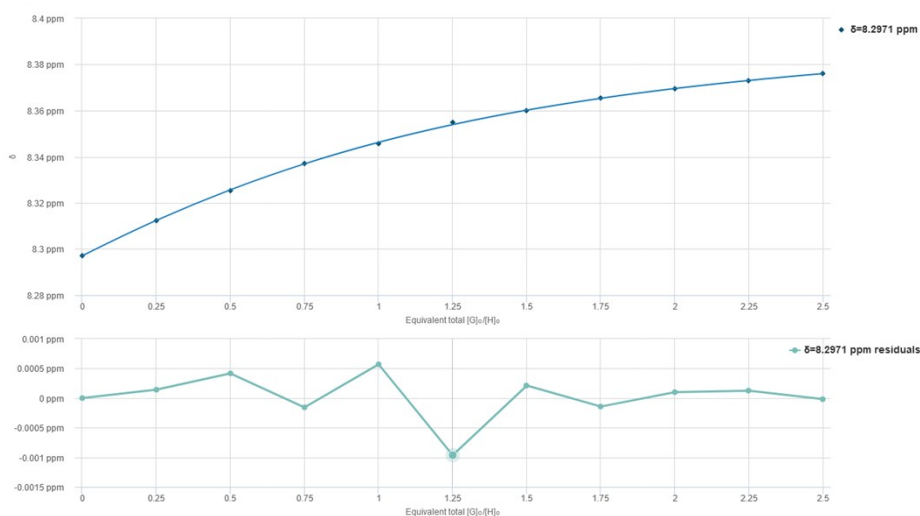

**Fig. S22** Nonlinear curve regression of  $z_{\text{meso}}$  upon addition of  $C_{70}$  by using 1:1 binding model associated with the program BindFit<sup>®</sup>.

## 7. X-ray Crystallographic Data for Compounds

Single crystals of **1** suitable for X-ray diffraction analysis were grown by slow diffusion of methanol into chloroform solution at room temperature, **2<sub>meso</sub>** was grown by slow diffusion of chlorobenzene into methanol solution at room temperature, **2<sub>rac</sub>** was grown by slow diffusion of toluene into methanol solution at room temperature. The X-ray diffraction data were collected on a MM007HF Saturn724+ diffractometer with graphite monochromated Cu K $\alpha$  (1.54184 Å) and Mo K $\alpha$  (0.71073 Å). These structures were refined using the SHELXL-2018. Crystallographic data have been deposited with the Cambridge Crystallographic Data Centre as supplementary publication No. CCDC 2353253 (**1**), 2353606 (**2<sub>meso</sub>**) and 2353623 (**2<sub>rac</sub>**). The single crystal X-ray crystallographic data were summarized in Table S7. (NOTE: The large Rint value in the checkcif report of **2<sub>rac</sub>** was due to the weak reflection intensity at higher angles; Due to the weak diffraction of **2<sub>rac</sub>** crystals, some reflections with large estimated standard deviations were omitted during refinement.)

**Table S7.** Crystal data and structure refinement for **1**, **2<sub>meso</sub>** and **2<sub>rac</sub>**.

| Identification code                              | <b>1</b>                                               | <b>2<sub>meso</sub></b>                              | <b>2<sub>rac</sub></b>                               |
|--------------------------------------------------|--------------------------------------------------------|------------------------------------------------------|------------------------------------------------------|
| Empirical formula                                | C <sub>136</sub> H <sub>170</sub> CHCl <sub>3</sub>    | C <sub>142</sub> H <sub>163</sub> Cl                 | C <sub>136</sub> H <sub>158</sub>                    |
| Formula weight                                   | 1924.08                                                | 1905.16                                              | 1792.61                                              |
| Crystal system                                   | Monoclinic                                             | Monoclinic                                           | orthorhombic                                         |
| Space group                                      | C <sub>2</sub> /c                                      | P 2 <sub>1</sub> /c                                  | Fd <sub>3</sub>                                      |
| Radiation type                                   | Cu K $\alpha$                                          | Cu K $\alpha$                                        | Mo K $\alpha$                                        |
| Radiation wavelength(Å)                          | 1.54178                                                | 1.54184                                              | 0.71073                                              |
| T(K)                                             | 169.99(10)                                             | 169.99(10)                                           | 117.40(14)                                           |
| a(Å)                                             | 38.6708(6)                                             | 23.7294(2)                                           | 46.521(2)                                            |
| b(Å)                                             | 24.1800(2)                                             | 16.10060(10)                                         | 45.590(2)                                            |
| c(Å)                                             | 26.6822(6)                                             | 31.9392(2)                                           | 24.322(2)                                            |
| $\alpha$ (deg)                                   | 90                                                     | 90                                                   | 90                                                   |
| $\beta$ (deg)                                    | 108.601(2)                                             | 101.5800(10)                                         | 90                                                   |
| $\gamma$ (deg)                                   | 90                                                     | 90                                                   | 90                                                   |
| V(Å <sup>3</sup> )                               | 23646.2(7)                                             | 11954.24(15)                                         | 51585(6)                                             |
| Z                                                | 8                                                      | 4                                                    | 16                                                   |
| $\rho$ calc (g cm <sup>-3</sup> )                | 1.081                                                  | 1.059                                                | 0.923                                                |
| $\theta$ , range(°)                              | 7.116 - 135.236                                        | 6.948 - 133.580                                      | 6.022 - 50.196                                       |
| R(int)                                           | 9.41%                                                  | 13.40%                                               | 19.1%                                                |
| $\mu$ (mm <sup>-1</sup> )                        | 1.054                                                  | 0.640                                                | 0.052                                                |
| F(000)                                           | 8352.0                                                 | 4128.0                                               | 15584.0                                              |
| Crystal size (mm <sup>3</sup> )                  | 0.28 × 0.13 × 0.05                                     | 0.36 × 0.28 × 0.021                                  | 0.34 × 0.33 × 0.12                                   |
| Index ranges                                     | -45 ≤ h ≤ 45,<br>-28 ≤ k ≤ 28,<br>-30 ≤ l ≤ 31         | -25 ≤ h ≤ 27,<br>-18 ≤ k ≤ 19,<br>-38 ≤ l ≤ 37       | -41 ≤ h ≤ 55,<br>-52 ≤ k ≤ 54,<br>-29 ≤ l ≤ 27       |
| Absorption correction                            | spherical harmonics                                    | spherical harmonics                                  | spherical harmonics                                  |
| Max. transmission                                | 1.000                                                  | 1.000                                                | 1.000                                                |
| Min. transmission                                | 0.802                                                  | 0.475                                                | 0.967                                                |
| Goodness-of-fit on F <sup>2</sup>                | 2.231                                                  | 1.035                                                | 1.244                                                |
| Final R indices<br>[I > 2 $\sigma$ (I)]          | R <sub>1</sub> = 0.1161,<br>wR <sub>2</sub> = 0.0.3203 | R <sub>1</sub> = 0.0701,<br>wR <sub>2</sub> = 0.2011 | R <sub>1</sub> = 0.1200,<br>wR <sub>2</sub> = 0.2732 |
| R indices (all data)                             | R <sub>1</sub> = 0.1397,<br>wR <sub>2</sub> = 0.3350   | R <sub>1</sub> = 0.0900,<br>wR <sub>2</sub> = 0.2191 | R <sub>1</sub> = 0.2174,<br>wR <sub>2</sub> = 0.3108 |
| Largest diff. peak and hole (e.Å <sup>-3</sup> ) | 0.99 and -0.35                                         | 0.52 and -0.64                                       | 0.45/-0.24                                           |



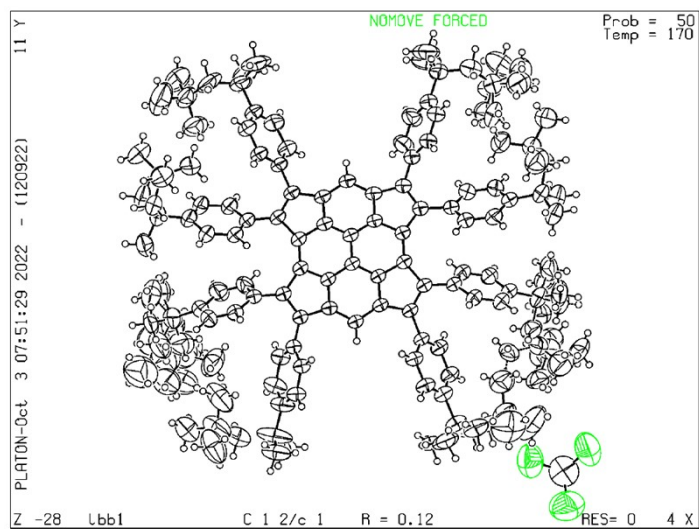

**Fig. S23** Thermal ellipsoids drawn at the 50% probability level of **1**. Chlorine atoms are depicted by green ellipsoids; Hydrogens are depicted by white circles.

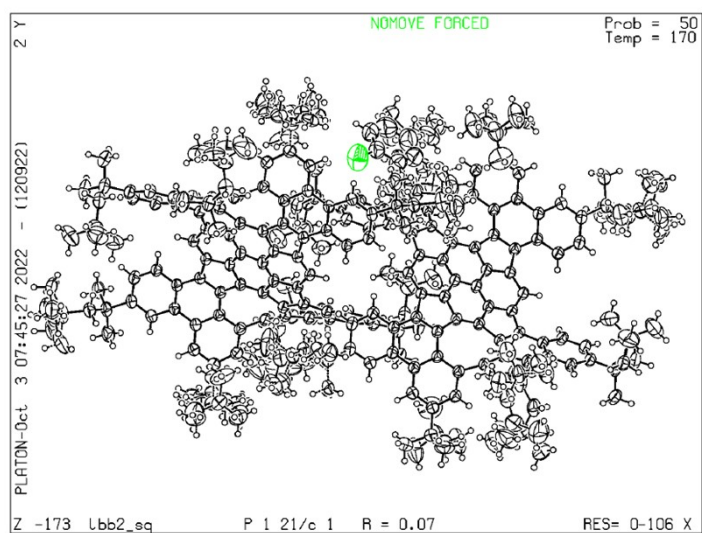

**Fig. S24** Thermal ellipsoids drawn at the 50% probability level of **2<sub>meso</sub>**. Chlorine atoms are depicted by green ellipsoids; Hydrogens are depicted by white circles.

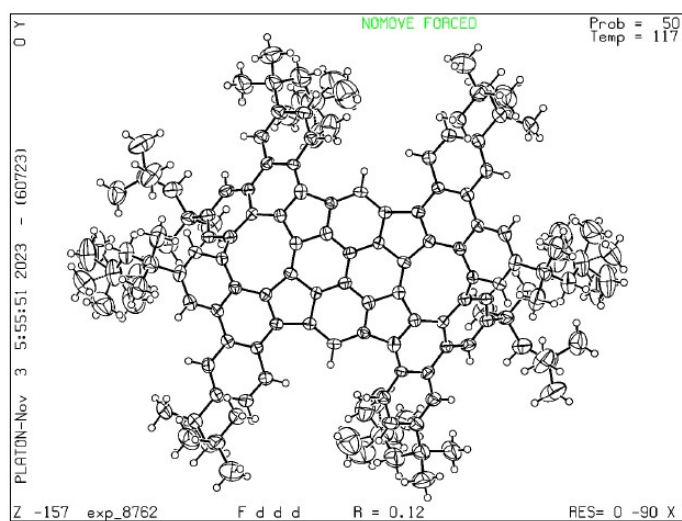

**Fig. S25** Thermal ellipsoids drawn at the 50% probability level of **2<sub>rac</sub>**. Hydrogens are depicted by white circles.

## 8. $^1\text{H}$ NMR, $^{13}\text{C}$ NMR, and HRMS Spectra of Compounds

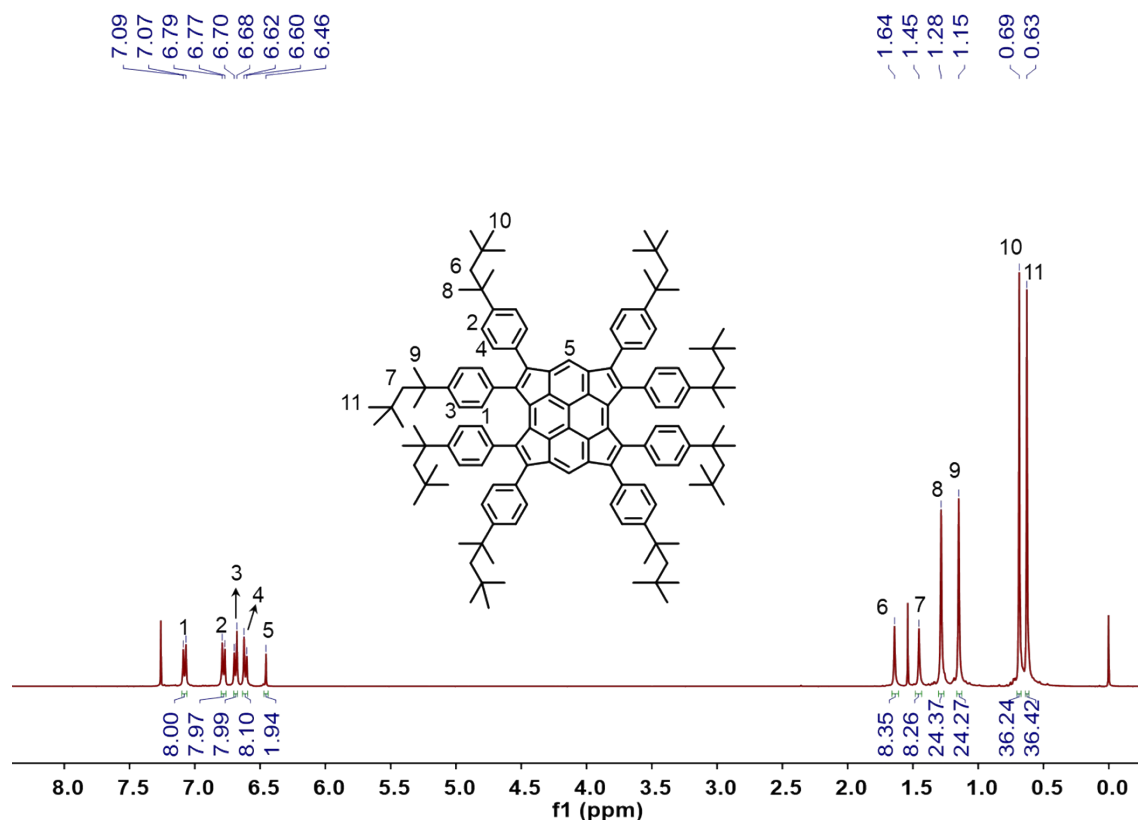

Fig. S26  $^1\text{H}$  NMR spectrum of **1** (Chloroform- $d$ , 400 MHz, 298 K)

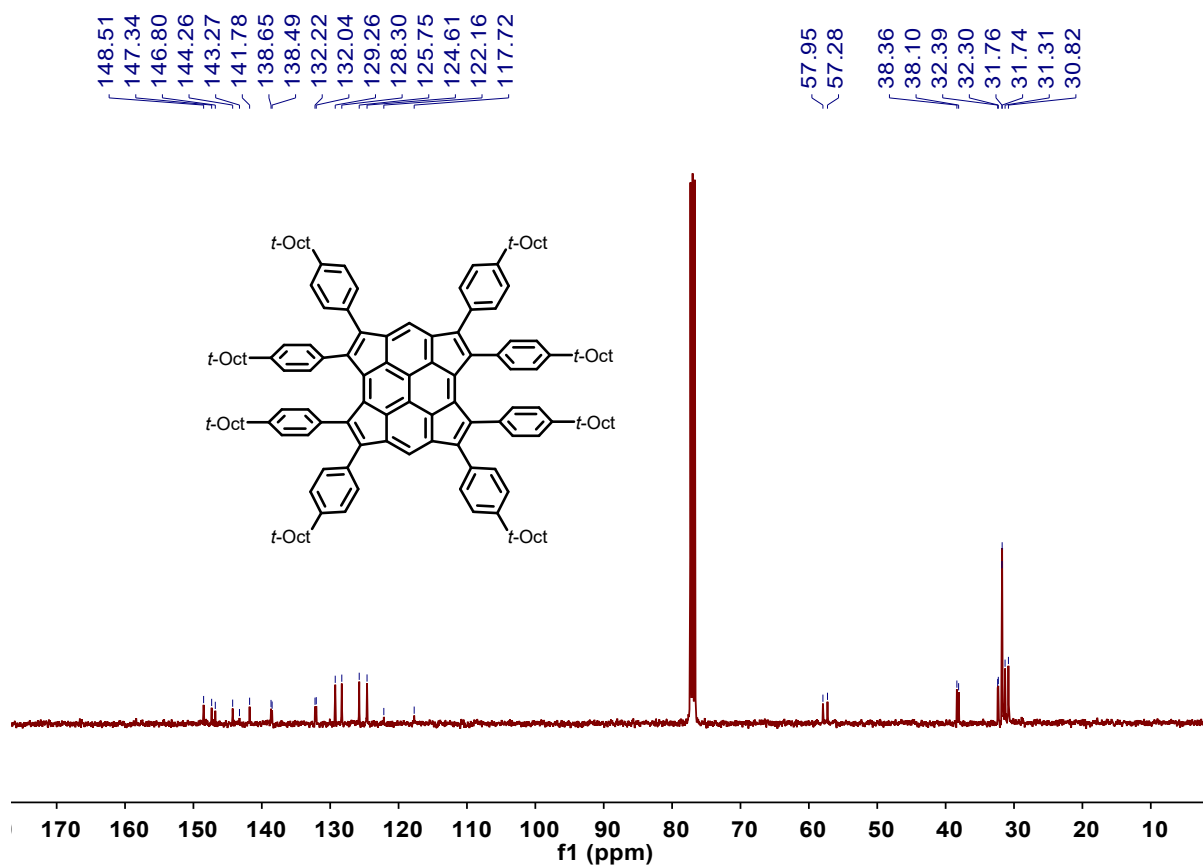

Fig. S27  $^{13}\text{C}$  NMR spectrum of **1** (Chloroform- $d$ , 101 MHz, 298 K).

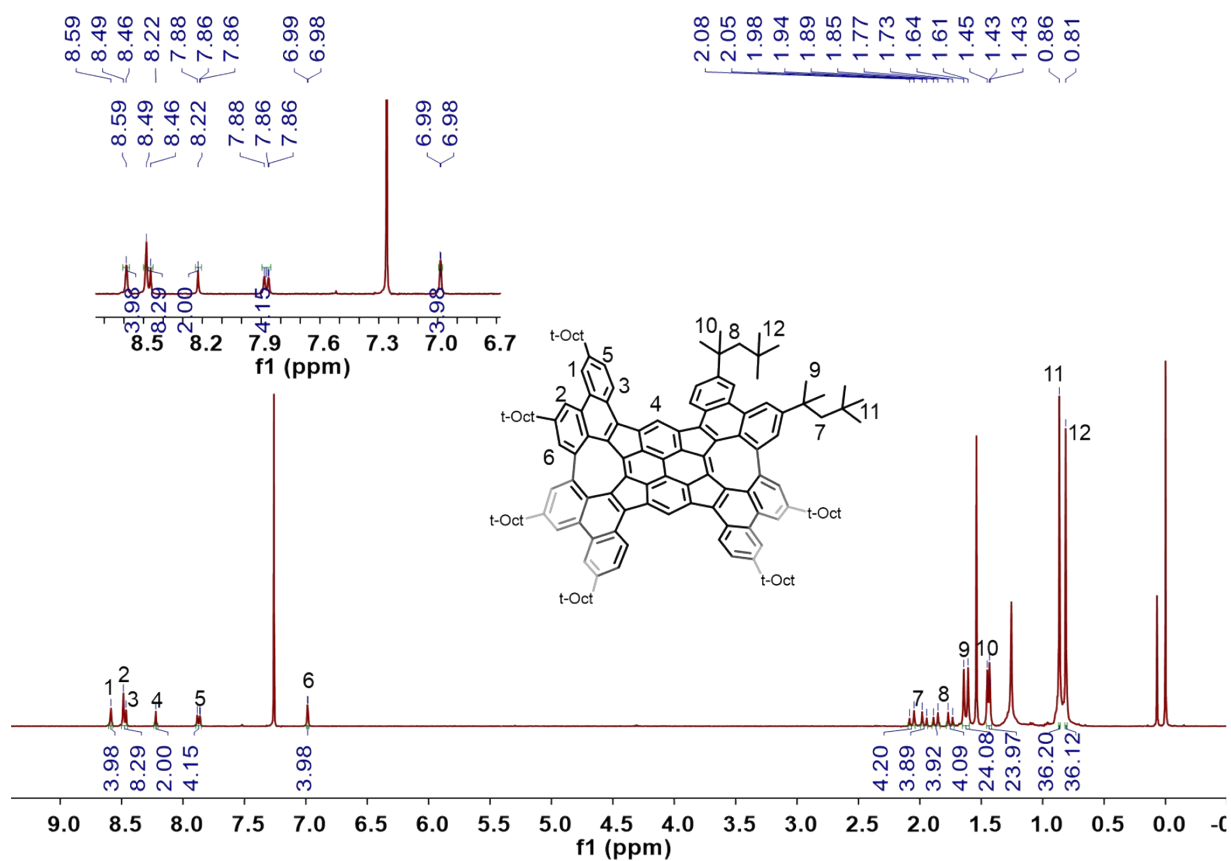

Fig. S28 <sup>1</sup>H NMR spectrum of **2<sub>meso</sub>** (Chloroform-*d*, 400 MHz, 298 K).

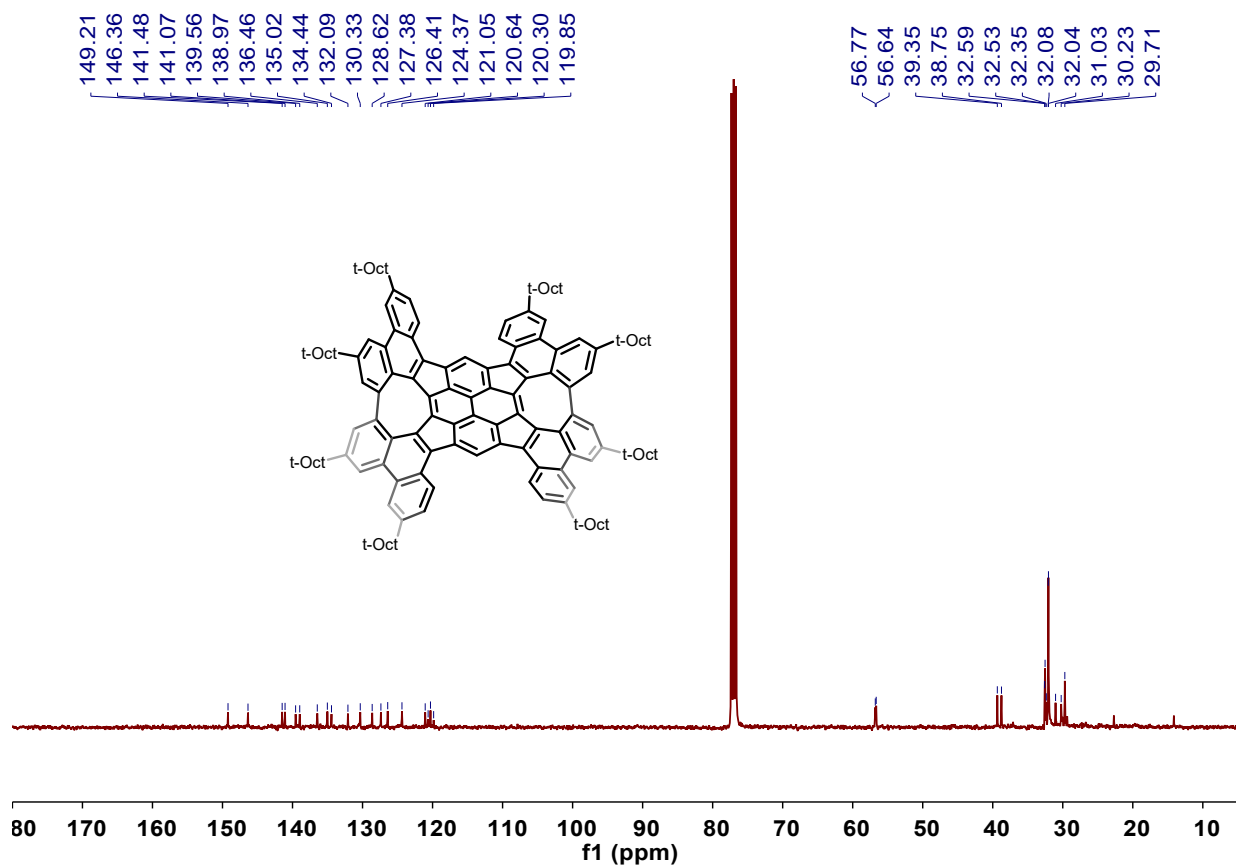

Fig. S29 <sup>13</sup>C NMR spectrum of **2<sub>meso</sub>** (Chloroform-*d*, 101 MHz, 298 K).

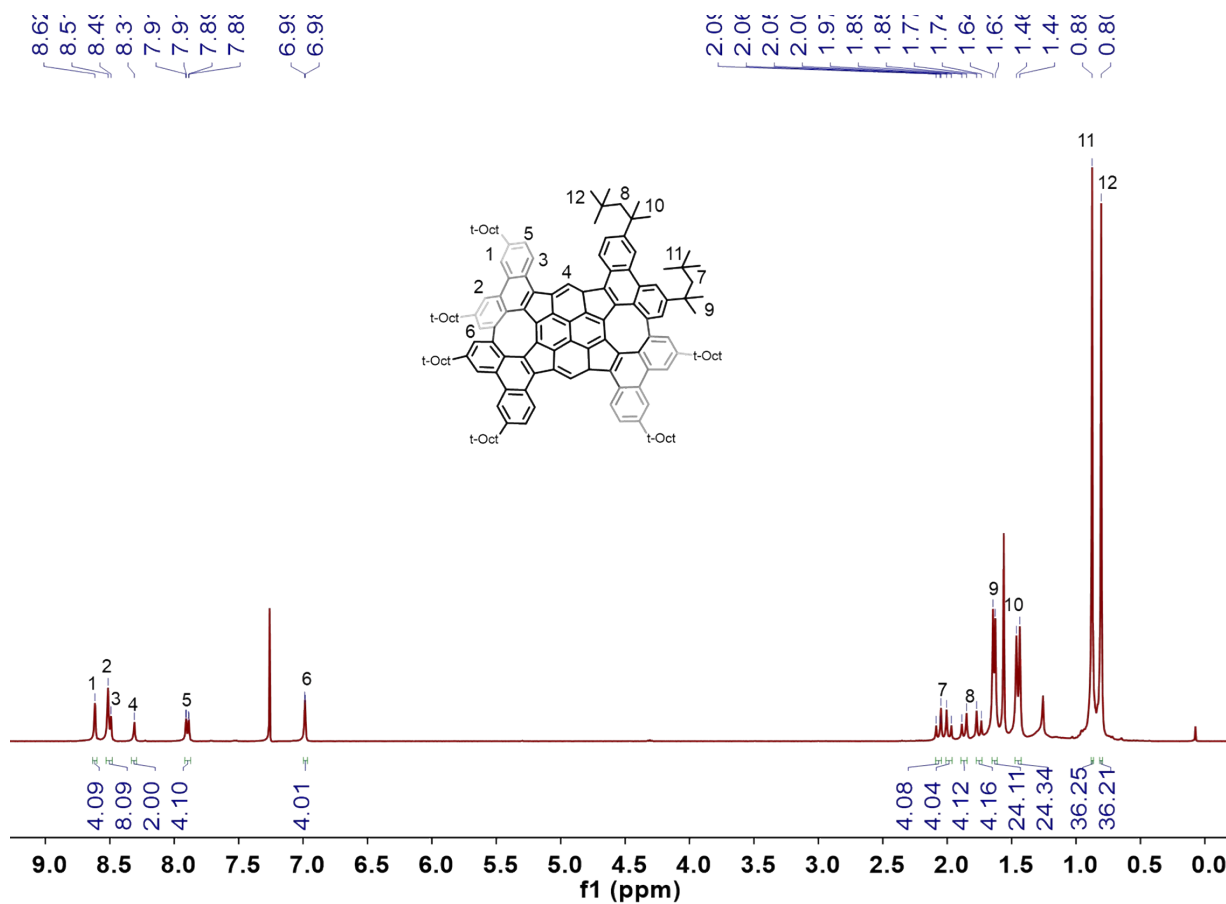

Fig. S30 <sup>1</sup>H NMR spectrum of **2<sub>rac</sub>** (Chloroform-*d*, 400 MHz, 298 K).

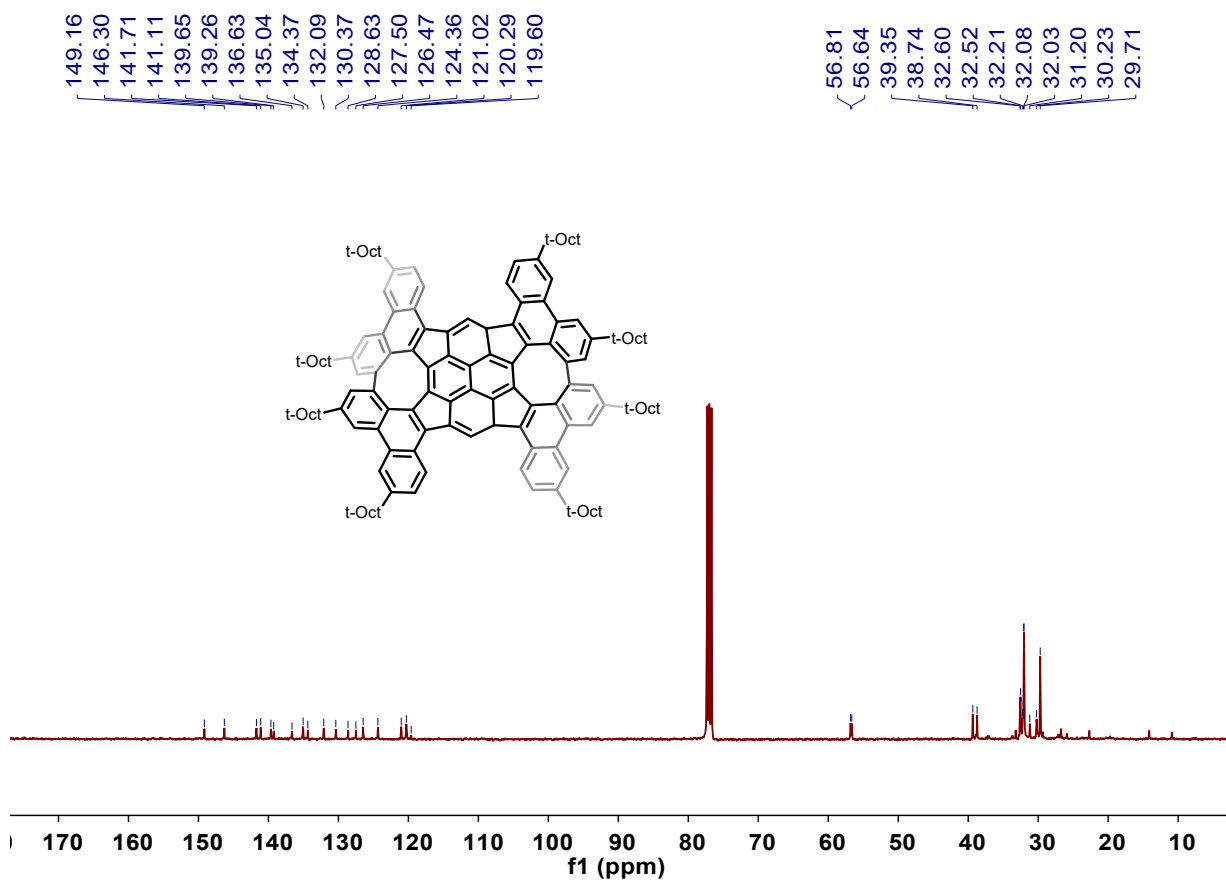

Fig. S31 <sup>13</sup>C NMR spectrum of **2<sub>rac</sub>** (Chloroform-*d*, 101 MHz, 298 K).

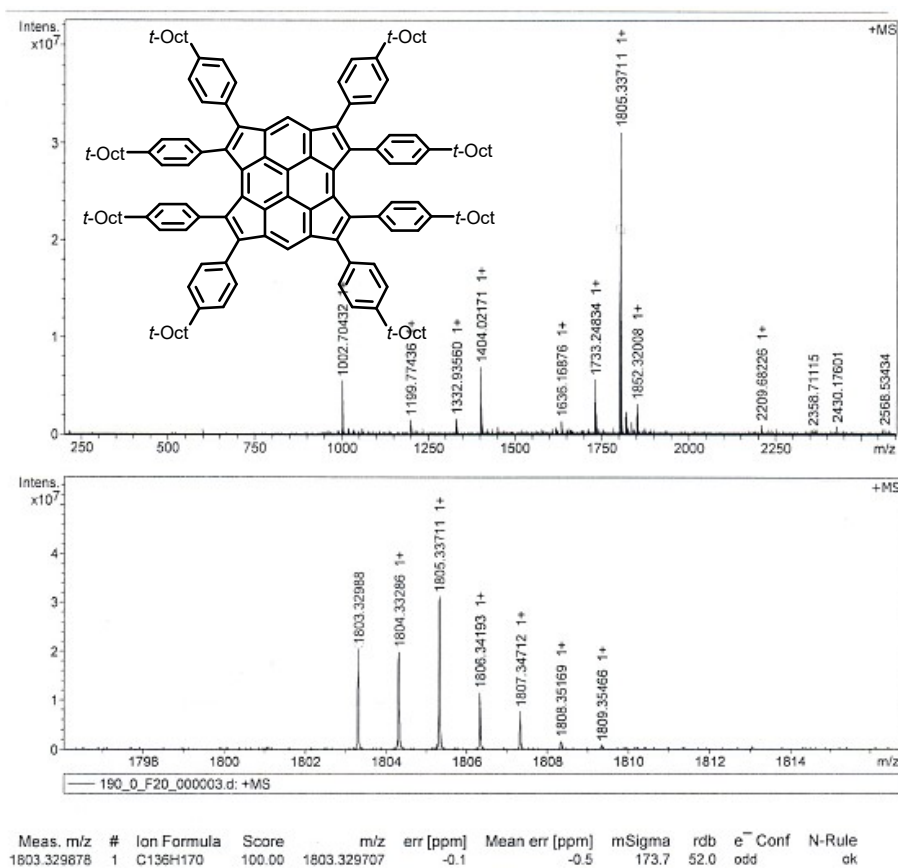

Fig. S32 HR-MALDI-TOF spectrum of **1**.

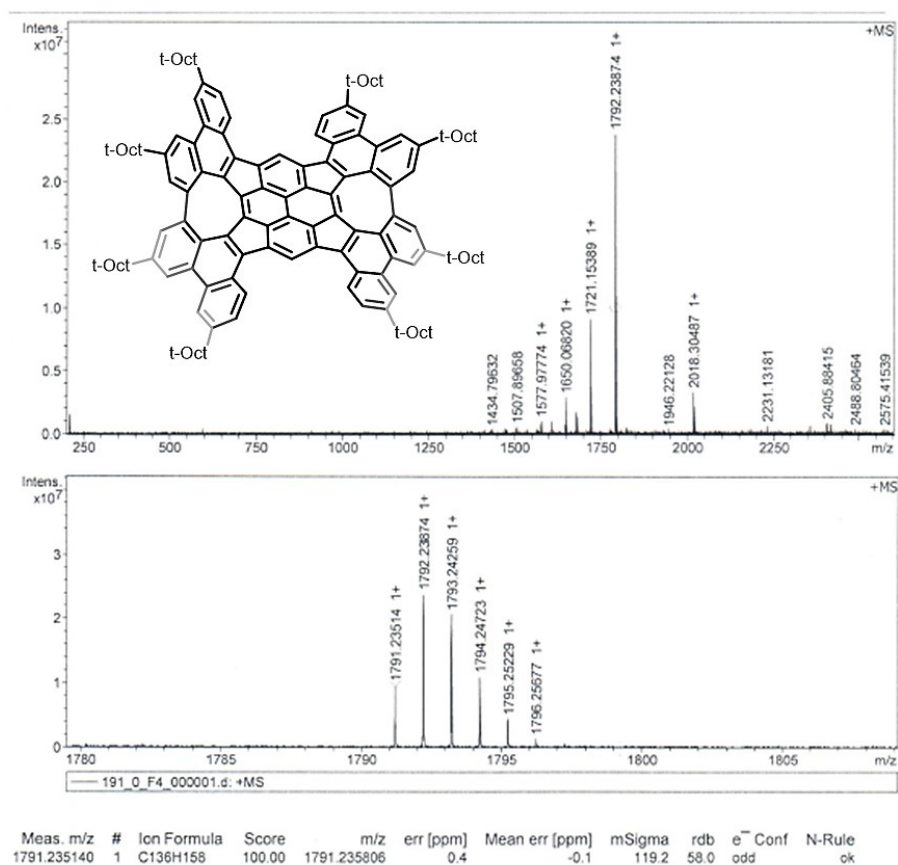

Fig. S33 HR-MALDI-TOF spectrum of **2<sub>meso</sub>**.

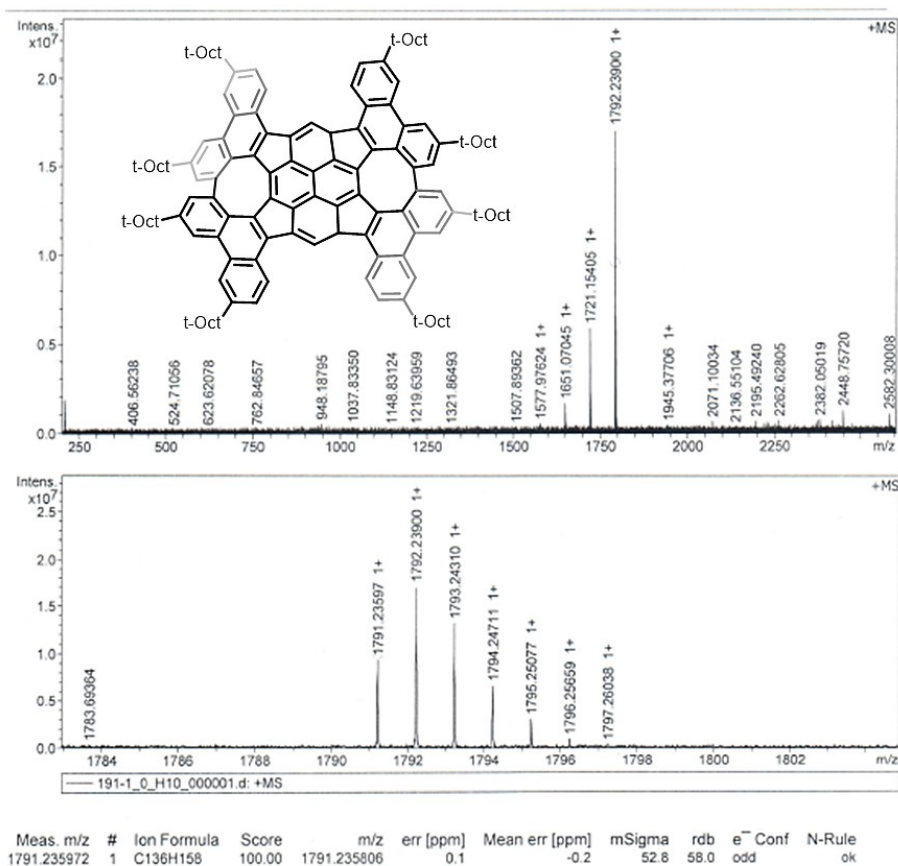

Fig. S34 HR-MALDI-TOF spectrum of  $z_{rac}$ .

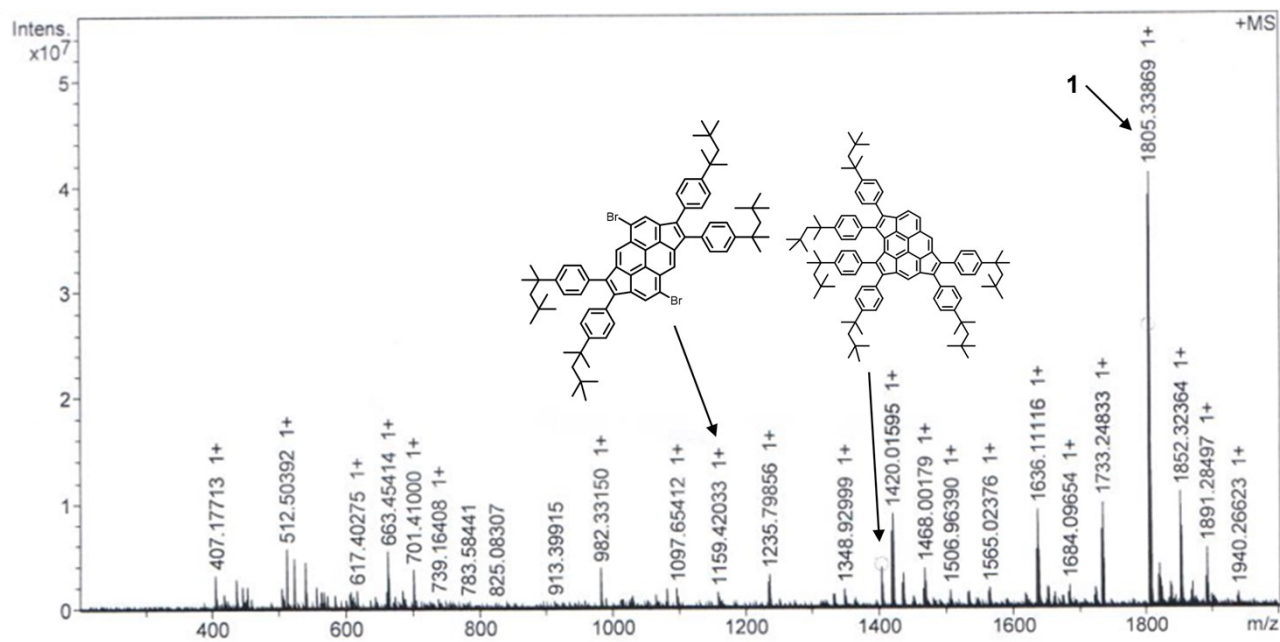

Fig. S35 HR-MALDI-TOF spectrum of two intermediates in the cyclopentannulation reaction.

## 9. References

- [1] C. D. Eversloh, Y. Avlasevich, C. Li and K. Müllen, *Chem. Eur. J.* 2011, **17**, 12756.
- [2] T. S. Carter, T. J. Mooibroek, P. F. N. Stewart, M. P. Crump, M. C. Galan and A. P. Davis. *Angew. Chem. Int. Ed.* 2016, **55**, 9311.
- [3] M. J. Mio, L. C. Kopel, J. B. Braun, T. L. Gadzikwa, K. L. Hull, R. G. Brisbois, C. J. Markworth, and P. A. Grieco.

*Org. Lett.*, 2002, **4**, 3199.

[4] Gaussian 09, Revision D.01, M. J. Frisch, G. W. Trucks, H. B. Schlegel, G. E. Scuseria, M. A. Robb, J. R. Cheeseman, G. Scalmani, V. Barone, B. Mennucci, G. A. Petersson, H. Nakatsuji, M. Caricato, X. Li, H. P. Hratchian, A. F. Izmaylov, J. Bloino, G. Zheng, J. L. Sonnenberg, M. Hada, M. Ehara, K. Toyota, R. Fukuda, J. Hasegawa, M. Ishida, T. Nakajima, Y. Honda, O. Kitao, H. Nakai, T. Vreven, J. A. Montgomery, Jr., J. E. Peralta, F. Ogliaro, M. Bearpark, J. J. Heyd, E. Brothers, K. N. Kudin, V. N. Staroverov, T. Keith, R. Kobayashi, J. Normand, K. Raghavachari, A. Rendell, J. C. Burant, S. S. Iyengar, J. Tomasi, M. Cossi, N. Rega, J. M. Millam, M. Klene, J. E. Knox, J. B. Cross, V. Bakken, C. Adamo, J. Jaramillo, R. Gomperts, R. E. Stratmann, O. Yazyev, A. J. Austin, R. Cammi, C. Pomelli, J. W. Ochterski, R. L. Martin, K. Morokuma, V. G. Zakrzewski, G. A. Voth, P. Salvador, J. J. Dannenberg, S. Dapprich, A. D. Daniels, O. Farkas, J. B. Foresman, J. V. Ortiz, J. Cioslowski, and D. J. Fox, Gaussian, Inc., Wallingford CT, 2013.

[5] T. Lu, and F. Chen, *J. Comput. Chem.*, 2012, **33**, 580.

[6] T. Lu, and Q. Chen, *J. Comput. Chem.* 2022, **43**, 539.

[7] W. Humphrey, A. Dalke and K. Schulten, *J. Mol. Graph.*, 1996, **14**, 33.

[8] (a) Z. Chen, C. S. Wannere, C. Corminboeuf, R. Puchta, and P. v. R. Schleyer, *Chem. Rev.* 2015, **105**, 3842. (b) H. Fallah-Bagher-Shaidaei, S. S. Wannere, C. Corminboeuf, R. Puchta, and P. v. R. Schleyer, *Org. Lett.* 2006, **8**, 863.

[9] D. Geuenich, K. Hess, F. Köhler and R. Herges, *Chem. Rev.* 2005, **105**, 3758.

[10] P. Thordarson, *Chem. Soc. Rev.*, 2011, **40**, 1305. <http://www.supramolecular.org>.
